# Supplementary material for: Inhibition of Cholinesterases by Benzothiazolone Derivatives
Source: MDPI journal article supplement (doi:10.3390/pr10091872), 2022-09-16
Supplement: s1 [file s1]

# SUPPLEMENTARY MATERIALS

## Inhibition of Cholinesterases by Benzothiazolone Derivatives

Mehmet Abdullah Alagöz <sup>1,†</sup>, Seong-Min Kim <sup>2,†</sup>, Jong Min Oh <sup>2</sup>, Gülnur Arslan <sup>3</sup>, Zeynep Özdemir <sup>1</sup>, Suat Sari <sup>4</sup>, Azime Berna Özçelik <sup>5</sup>, Tijen Önkol <sup>5</sup>, Daniela Trisciuzzi <sup>6</sup>, Orazio Nicolotti <sup>6</sup>, Hoon Kim <sup>2,\*</sup> and Bijo Mathew <sup>7,\*</sup>

<sup>1</sup> Department of Pharmaceutical Chemistry, Faculty of Pharmacy, Inonu University, Malatya 44280, Turkey

<sup>2</sup> Department of Pharmacy, and Research Institute of Life Pharmaceutical Sciences, Sunchon National University, Suncheon 57922, Korea

<sup>3</sup> Department of Pharmaceutical Chemistry, Faculty of Pharmacy, Suleyman Demirel University, Isparta 32000, Turkey

<sup>4</sup> Department of Pharmaceutical Chemistry, Faculty of Pharmacy, Hacettepe University, Ankara 06230, Turkey

<sup>5</sup> Department of Pharmaceutical Chemistry, Faculty of Pharmacy, Gazi University, Ankara 06330, Turkey

<sup>6</sup> Dipartimento di Farmacia—Scienze del Farmaco, Università degli Studi di Bari “Aldo Moro”, Via E. Orabona, 4, I-70125 Bari, Italy

<sup>7</sup> Department of Pharmaceutical Chemistry, Amrita School of Pharmacy, Amrita Vishwa Vidyapeetham, AIMS Health Sciences Campus, Kochi 682041, India

\* Correspondence: hoon@sunchon.ac.kr (H.K.); bijovilaventgu@gmail.com or bijomathew@aims.amrita.edu (B.M.)

† These authors contributed equally to this work.

### Contents

**Figure S.** <sup>1</sup>H-NMR, <sup>13</sup>C-NMR, and HRMS spectra of the compounds **M1-13**

**Table S1.** Inhibitions of MAO by **M** series

**Figure S.**  $^1\text{H}$ -NMR,  $^{13}\text{C}$ -NMR, and HRMS spectra of the compounds **M1-13**

**Data 1.**  $^1\text{H}$ -NMR Spektral Data of **M1**

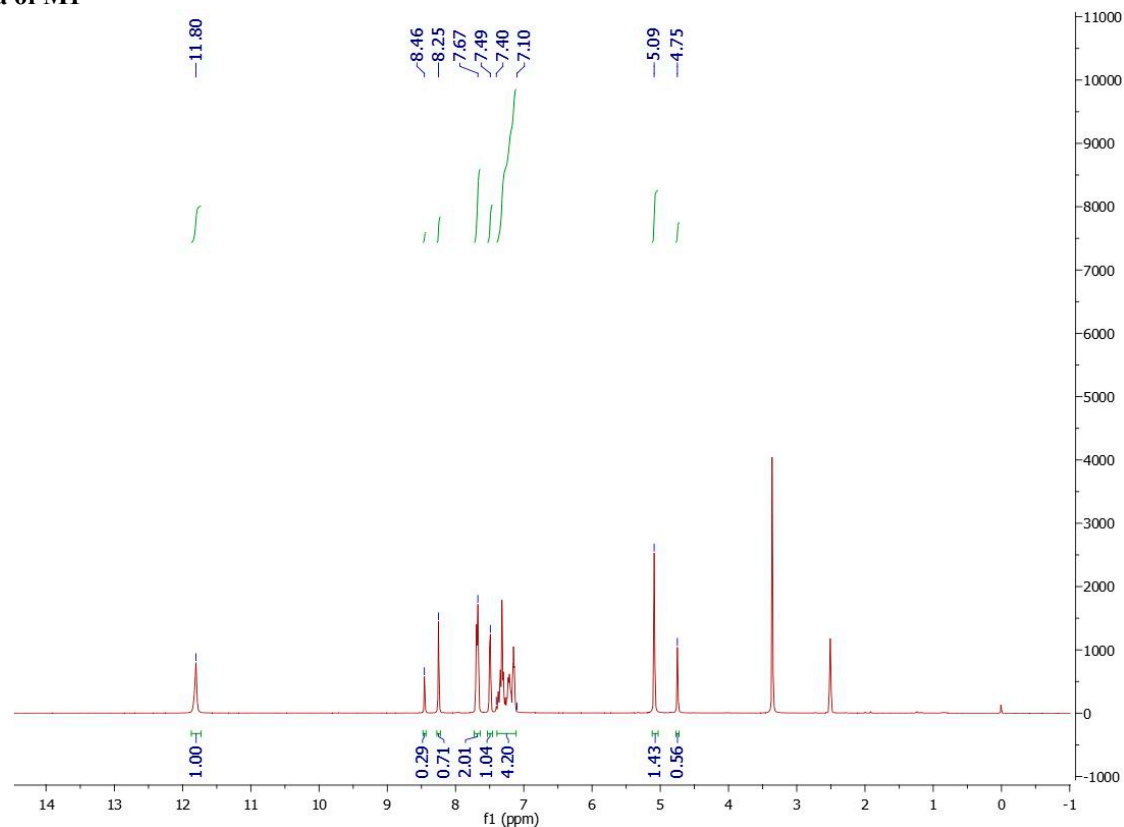

(*E/Z*;72/28%)-*N'*-(thiophen-2-ylmethylene)-2-(2-oxobenzo[d]thiazol-3(2H)-yl)- acetohydrazide (**M1**)

Yield: 91%; mp: 250-2 °C, white powder.  $^1\text{H}$  NMR (400 MHz, DMSO-*d*<sub>6</sub>):  $\delta$  4.75 (s, 2H, -CH<sub>2</sub>, %28), 5.09 (s, 2H, -CH<sub>2</sub>, %72), 7.13–7.43 (m, 4H, benzothiazolone), 7.49–7.67 (m, 3H, thiophene), 8.14 (s, H, N=CH, %72), 8.35 (s, H, N=CH, %28), 11.80 (s, H, NH).  $^{13}\text{C}$  NMR (100 MHz, DMSO-*d*<sub>6</sub>)  $\delta$  169.70, 167.40, 162.88, 140.01, 138.96, 137.94, 131.36, 129.29, 127.02, 123.61, 123.22, 121.55, 112.15, 43.77. HRMS (ESI): *m/z* calcd for C<sub>14</sub>H<sub>12</sub>N<sub>3</sub>O<sub>2</sub>S<sub>2</sub> [M+H]<sup>+</sup> 318,0371; found: 318.0366

Data 2.  $^{13}\text{C}$ -NMR Spektral Data of M1

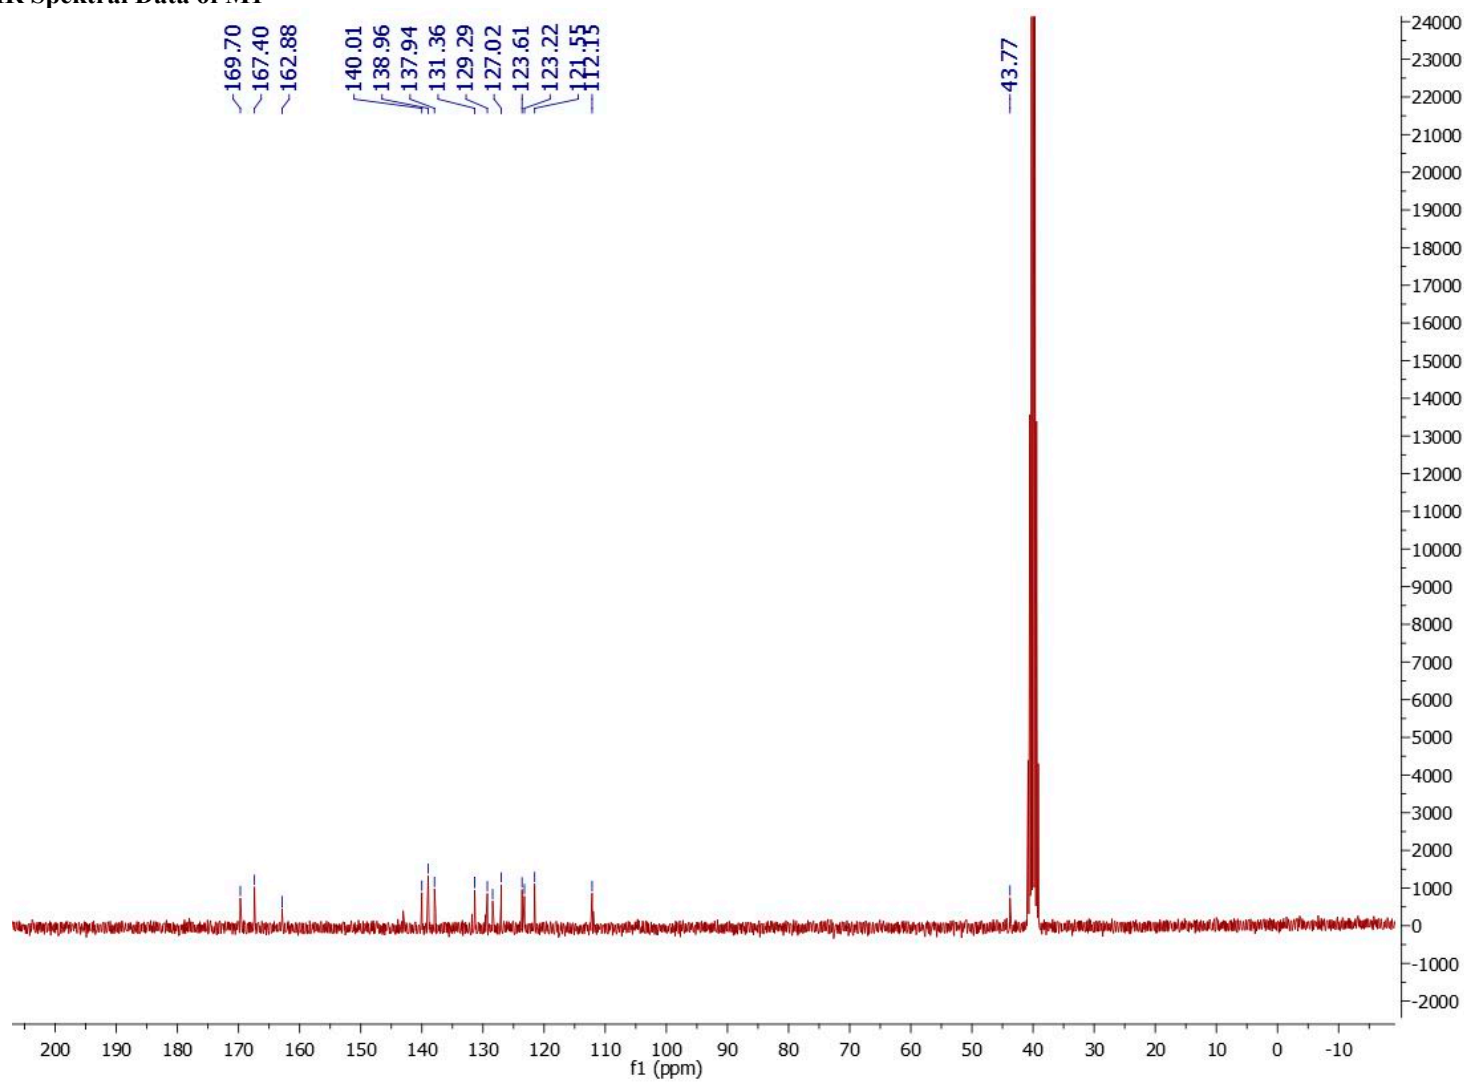

### Data 3. Mass Spectrum Data of M1

#### Single Mass Analysis

Tolerance = 5.0 PPM / DBE: min = -1.5, max = 50.0

Element prediction: Off

Number of isotope peaks used for i-FIT = 3

Monoisotopic Mass, Even Electron Ions

40 formula(e) evaluated with 1 results within limits (up to 50 best isotopic matches for each mass)

Elements Used:

| Mass     | Calc. Mass | mDa  | PPM  | DBE  | Formula          | i-FIT | i-FIT (Norm) | C  | H  | N | O | S |
|----------|------------|------|------|------|------------------|-------|--------------|----|----|---|---|---|
| 318.0366 | 318.0371   | -0.5 | -1.6 | 10.5 | C14 H12 N3 O2 S2 | 527.2 | 0.0          | 14 | 12 | 3 | 2 | 2 |

T581 100 (3.900) Cm (97:105)

1: TOF MS ES+

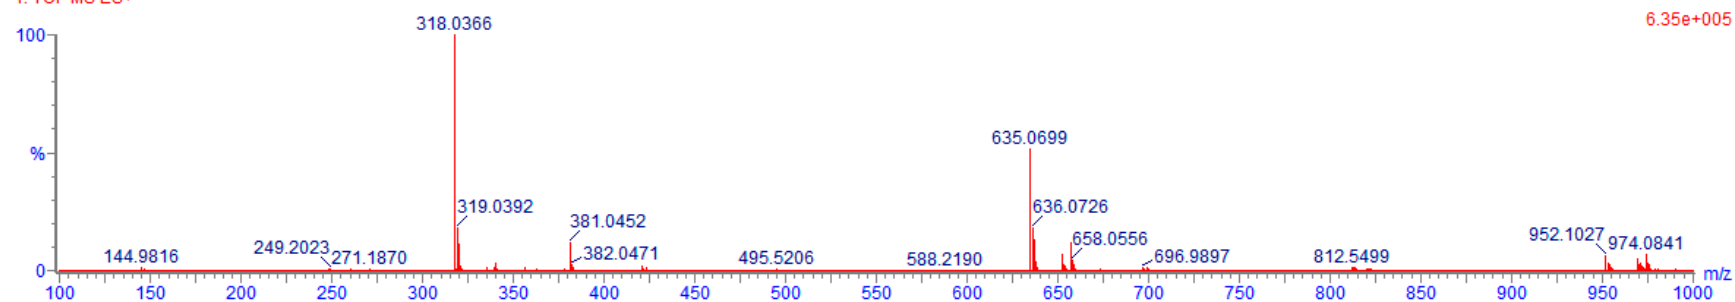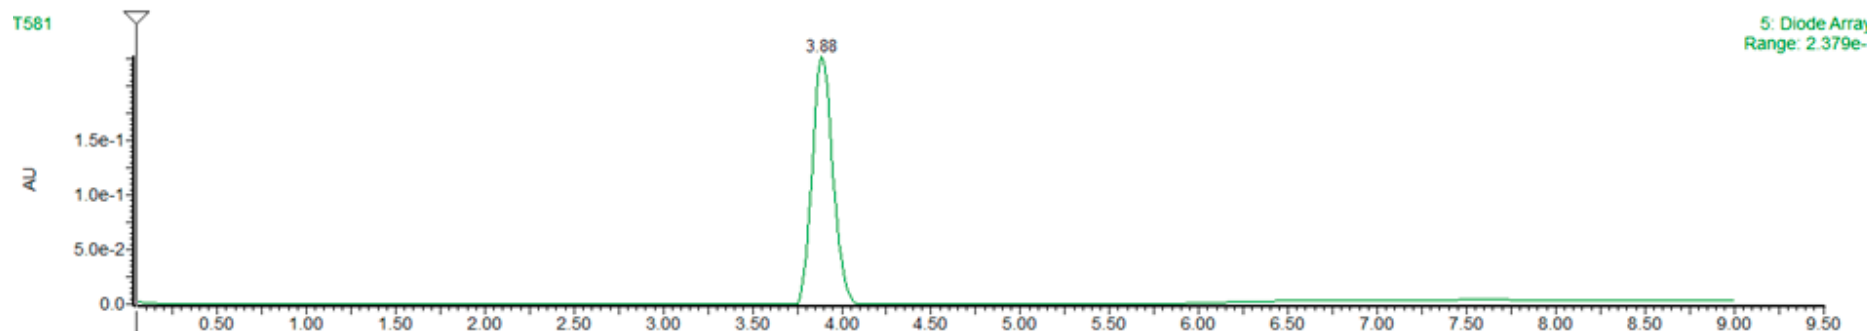

**Data 4.  $^1\text{H}$ -NMR Spektral Data of M2**

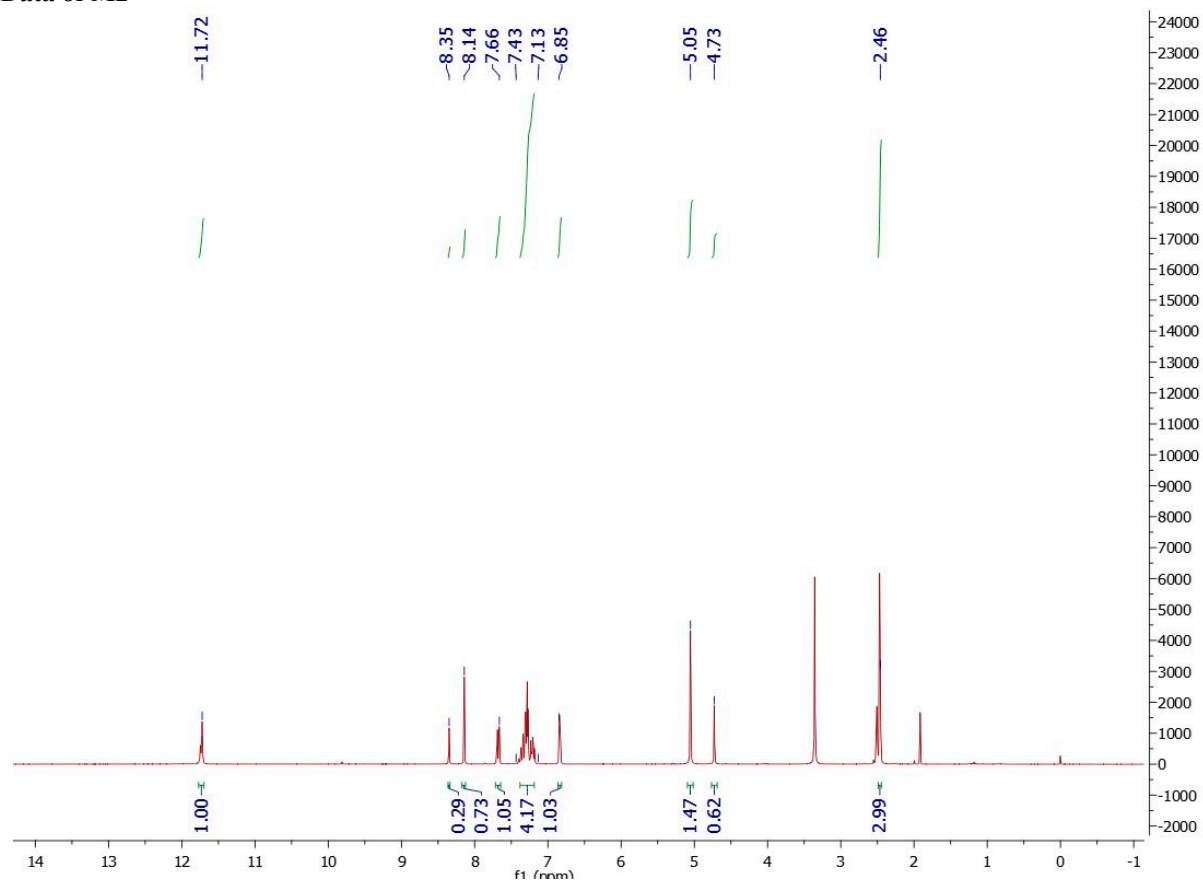

*E/Z*; 72/28%) -N'-((5-methylthiophen-2-yl)methylene)-2-(2-oxobenzo[d]thiazol-3(2H)-yl) acetohydrazide (**M2**)

Yield: 93%; mp: 284-6 °C, white powder.  $^1\text{H}$  NMR (400 MHz, DMSO- $d_6$ ):  $\delta$  2.46 (s, 3H, CH<sub>3</sub>), 4.73 (s, 2H, -CH<sub>2</sub>, %28), 5.05 (s, 2H, -CH<sub>2</sub>, %72), 6.85 (m, H, thiophene ) 7.10–7.40 (m, 4H, benzothiazolone), 7.66 (m, H, thiophene ), 8.25 (s, H, N=CH, %72), 8.46 (s, H, N=CH, %28), 11.72 (s, H, NH).  $^{13}\text{C}$  NMR (100 MHz, DMSO- $d_6$ )  $\delta$  169.69, 167.25, 143.21, 140.17, 137.95, 136.74, 131.69, 127.02, 126.85, 123.60, 123.21, 121.55, 112.13, 43.70, 15.78. HRMS (ESI):  $m/z$  calcd for C<sub>15</sub>H<sub>14</sub>N<sub>3</sub>O<sub>2</sub>S<sub>2</sub> [M+H]<sup>+</sup> 332.0527; found: 332.0525.

Data 5.  $^{13}\text{C}$ -NMR Spektral Data of M2

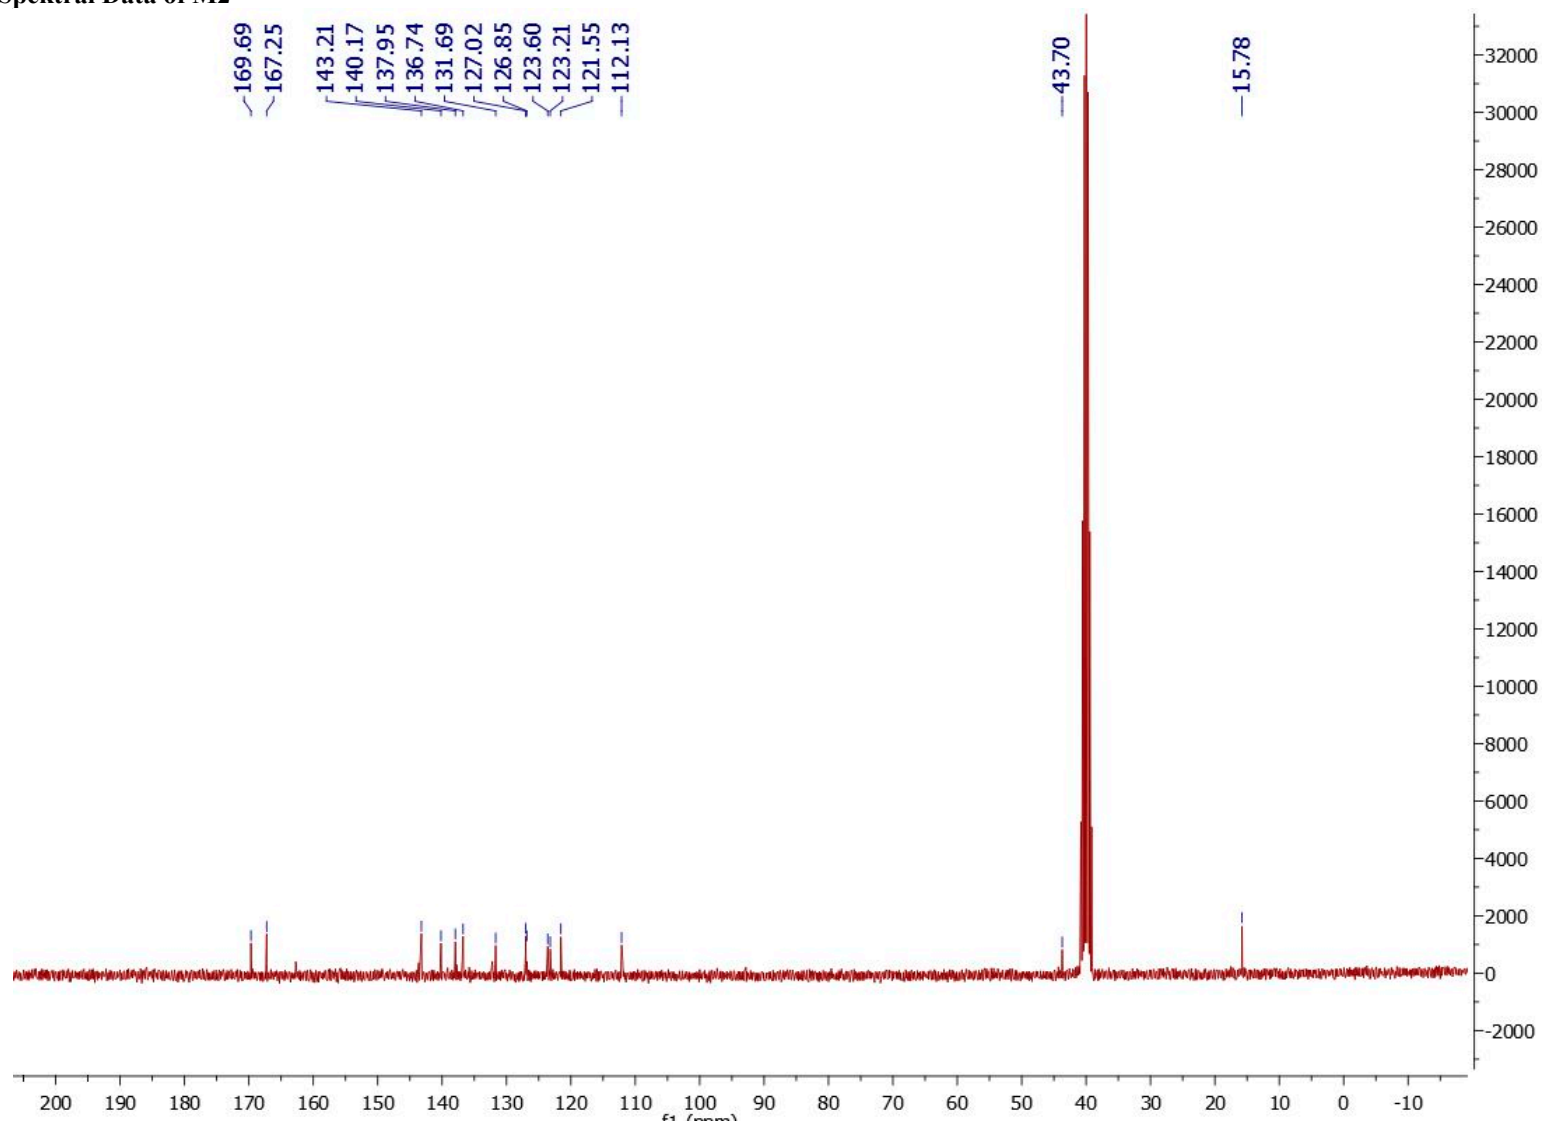

## Data 6. Mass Spectrum Data of M2

### Single Mass Analysis

Tolerance = 5.0 PPM / DBE: min = -1.5, max = 50.0

Element prediction: Off

Number of isotope peaks used for i-FIT = 3

Monoisotopic Mass, Even Electron Ions

32 formula(e) evaluated with 1 results within limits (up to 50 best isotopic matches for each mass)

Elements Used:

| Mass     | Calc. Mass | mDa  | PPM  | DBE  | Formula          | i-FIT | i-FIT (Norm) | C  | H  | N | O | S |
|----------|------------|------|------|------|------------------|-------|--------------|----|----|---|---|---|
| 332.0525 | 332.0527   | -0.2 | -0.6 | 10.5 | C15 H14 N3 O2 S2 | 457.1 | 0.0          | 15 | 14 | 3 | 2 | 2 |

T582\_2 108 (4.212) Cm (106:108)

1: TOF MS ES+

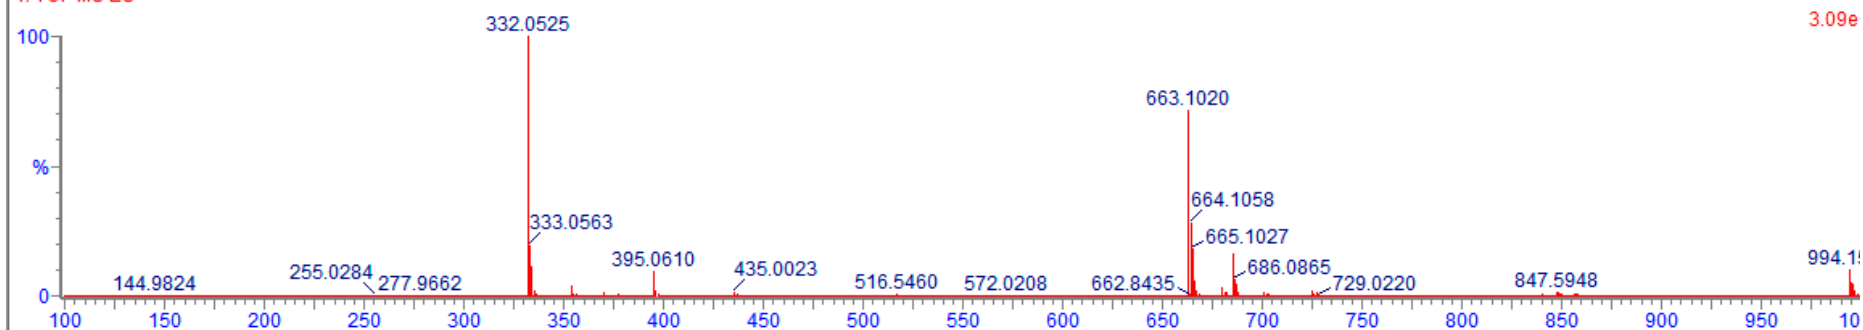

T582\_2

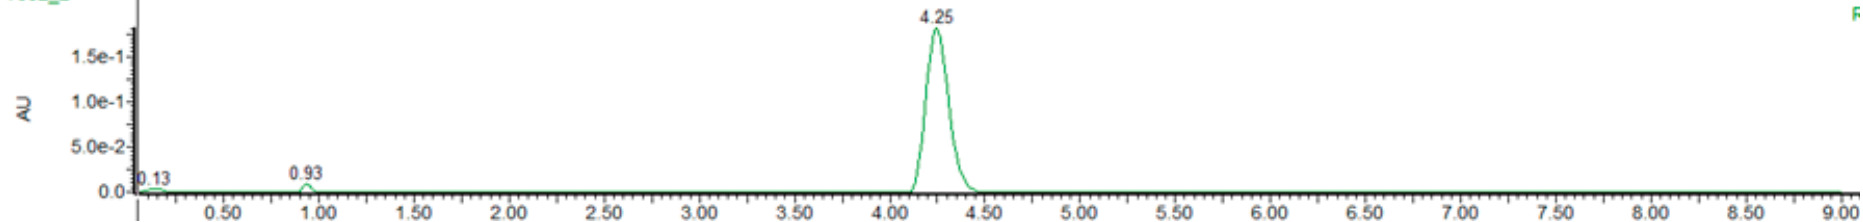

**Data 7.  $^1\text{H}$ -NMR Spektral Data of M3**

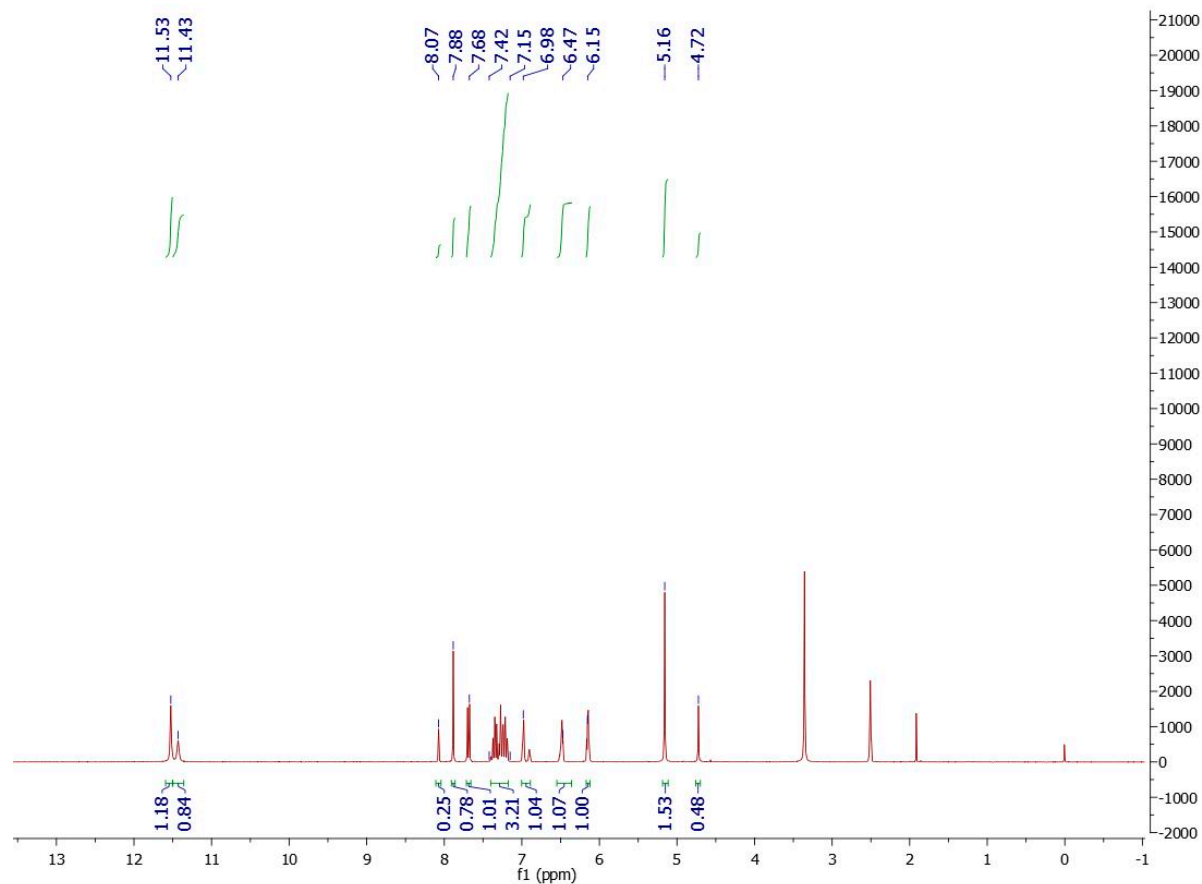

*E/Z*; 76/24%) -N'-((1H-pyrrol-2-yl)methylene)-2-(2-oxobenzo[d]thiazol-3(2H)-yl) acetohydrazide (**M3**)

Yield: 70%; mp: 238-40 °C, white powder.  $^1\text{H}$  NMR (400 MHz, DMSO- $d_6$ ):  $\delta$  4.72 (s, 2H, -CH<sub>2</sub>, %24), 5.16 (s, 2H, -CH<sub>2</sub>, %76), 6.15 (m, H, pyrrol), 6.47 (m, H, pyrrol), 6.98 (m, H, pyrrol), 7.15–7.68 (m, 4H, benzothiazolone), 7.88 (s, H, N=CH, %76), 8.07 (s, H, N=CH, %24), 11.43 (s, H, NH, pyrrol), 11.53 (s, H, NH).  $^{13}\text{C}$  NMR (100 MHz, DMSO- $d_6$ )  $\delta$  169.73, 167.20, 137.96, 137.27, 127.51, 127.09, 123.65, 123.29, 122.55, 121.60, 113.24, 111.96, 109.71, 43.95. HRMS (ESI):  $m/z$  calcd for C<sub>14</sub>H<sub>13</sub>N<sub>4</sub>O<sub>2</sub>S [M+H]<sup>+</sup> 301.0759; found: 301.0747.



Data 8.  $^{13}\text{C}$ -NMR Spektral Data of M3

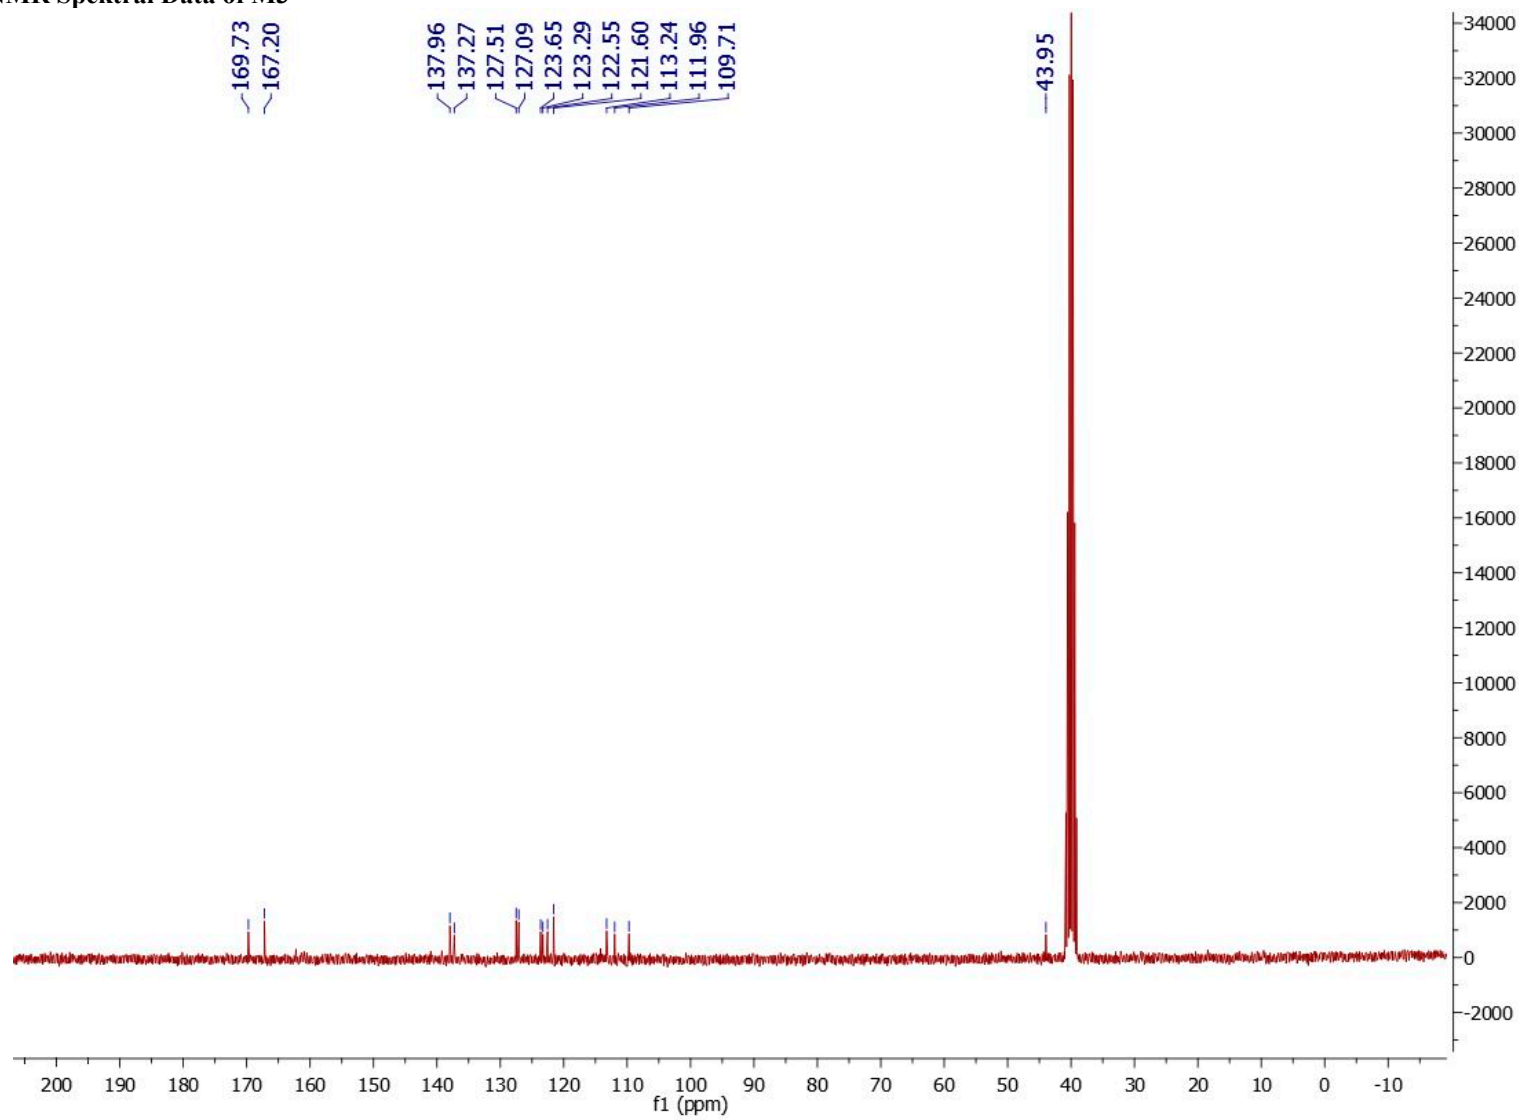

## Data 9. Mass Spectrum Data of M3

### Single Mass Analysis

Tolerance = 5.0 PPM / DBE: min = -1.5, max = 50.0

Element prediction: Off

Number of isotope peaks used for i-FIT = 3

Monoisotopic Mass, Even Electron Ions

26 formula(e) evaluated with 1 results within limits (up to 50 best isotopic matches for each mass)

Elements Used:

| Mass     | Calc. Mass | mDa  | PPM  | DBE  | Formula         | i-FIT | i-FIT (Norm) | C  | H  | N | O | S |
|----------|------------|------|------|------|-----------------|-------|--------------|----|----|---|---|---|
| 301.0747 | 301.0759   | -1.2 | -4.0 | 10.5 | C14 H13 N4 O2 S | 241.6 | 0.0          | 14 | 13 | 4 | 2 | 1 |

T583\_2 90 (3.526) Cm (90:92)

1: TOF MS ES+

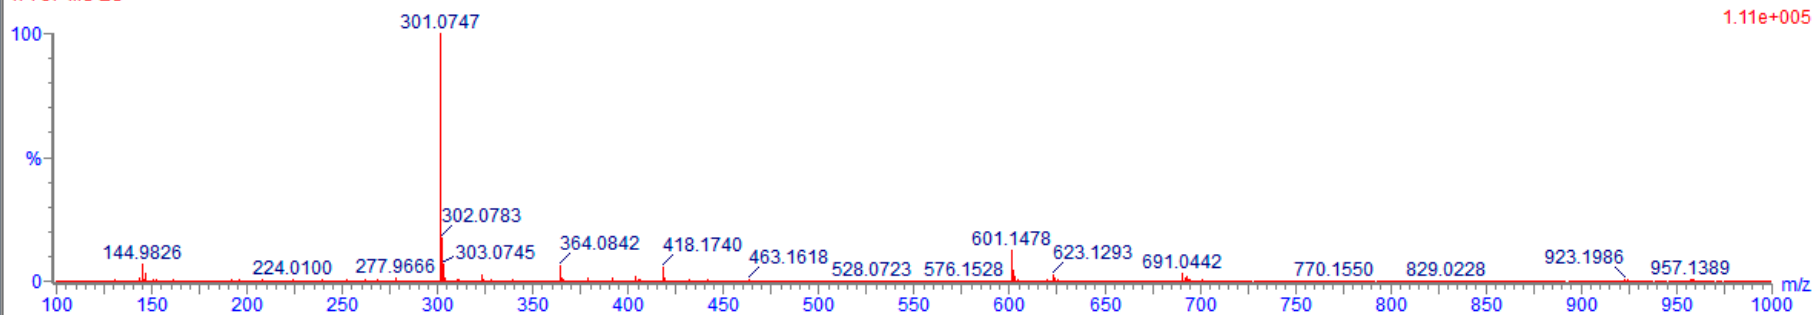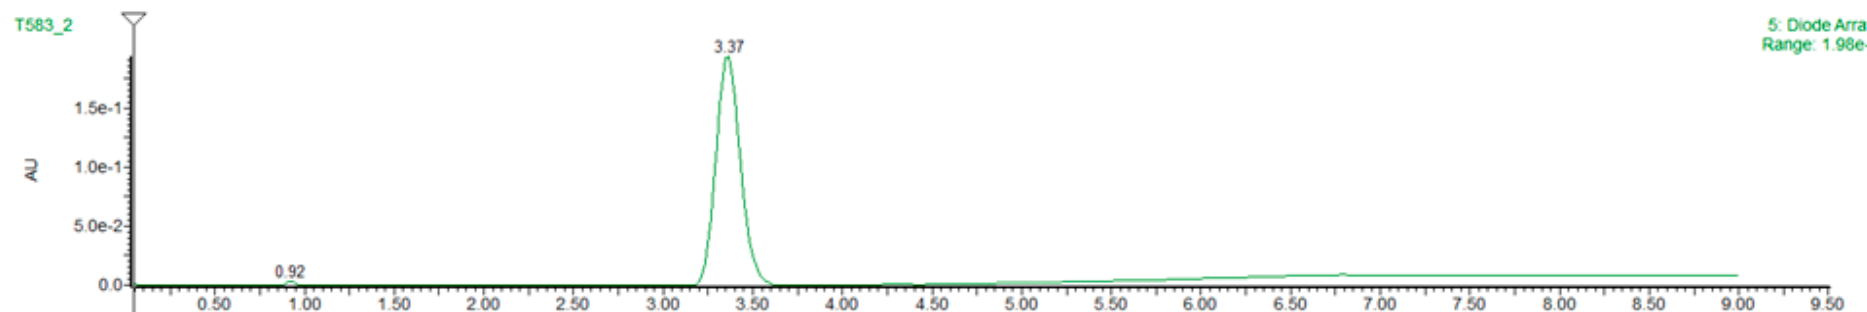

**Data 10.  $^1\text{H}$ -NMR Spektral Data of M4**

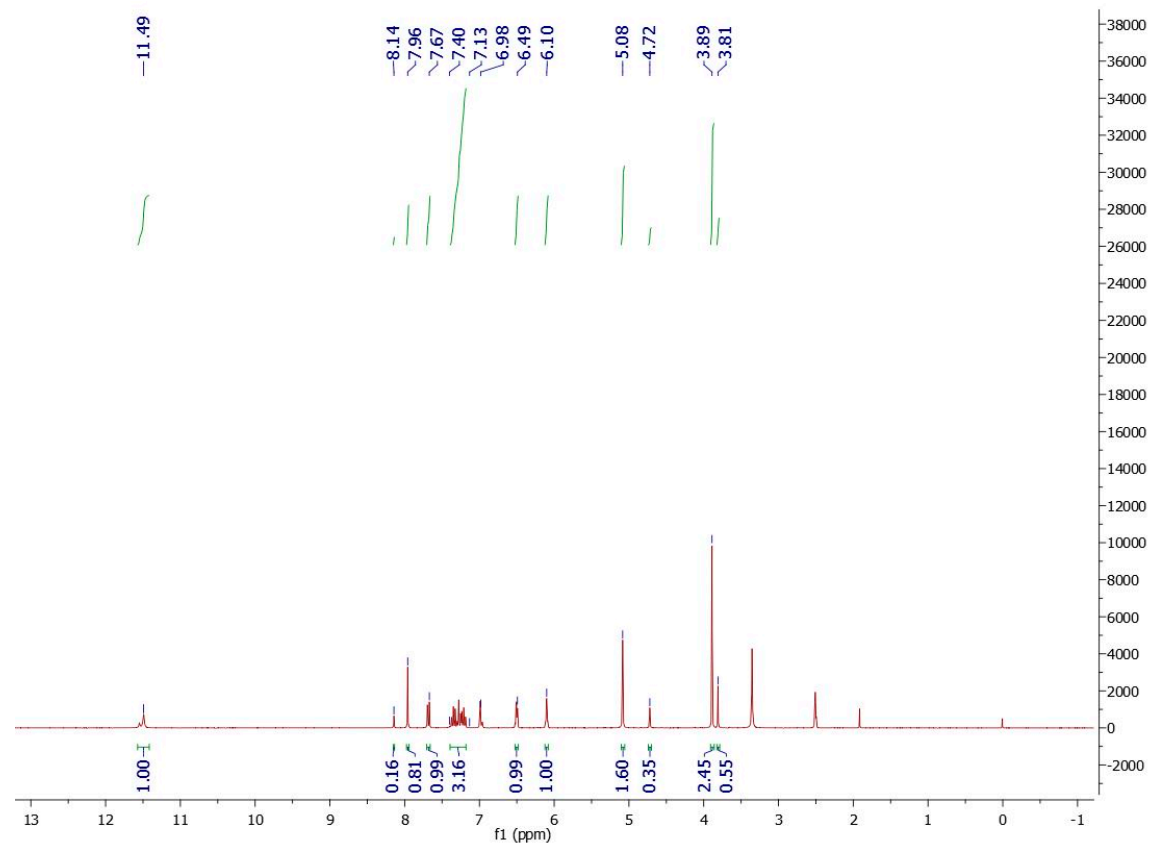

(*E/Z*;82/18%)-*N'*-((1-methyl-1H-pyrrol-2-yl)methylene)-2-(2-oxobenzo[d]thiazol-3(2H)-yl)acetohydrazide (**M4**)

Yield: 91%; mp: 264-6 °C, white powder.  $^1\text{H}$  NMR (400 MHz, DMSO-*d*<sub>6</sub>):  $\delta$  3.81 (s, 3H, CH<sub>3</sub>, 18% ), 3.89 (s, 3H, CH<sub>3</sub>, %82), 5.72 (s, 2H, -CH<sub>2</sub>, %18), 5.08 (s, 2H, -CH<sub>2</sub>, %82), 6.10 (m, H, pyrrol), 6.49 (m, H, pyrrol), 7.05 (m, H, pyrrol), 7.13–7.67 (m, 4H, benzothiazolone), 7.96 (s, H, N=CH, %82), 8.14 (s, H, N=CH, %18). 11.49 (s, H, NH).  $^{13}\text{C}$  NMR (100 MHz, DMSO-*d*<sub>6</sub>)  $\delta$  169.72, 167.05, 138.16, 137.93, 128.86, 127.09, 127.00, 123.61, 123.23, 121.57, 115.92, 112.08, 108.57, 43.99, 37.15. HRMS (ESI): *m/z* calcd for C<sub>15</sub>H<sub>15</sub>N<sub>4</sub>O<sub>2</sub>S [M+H]<sup>+</sup> 315.0916; found: 315.0905.

Data 11.  $^{13}\text{C}$ -NMR Spektral Data of M4

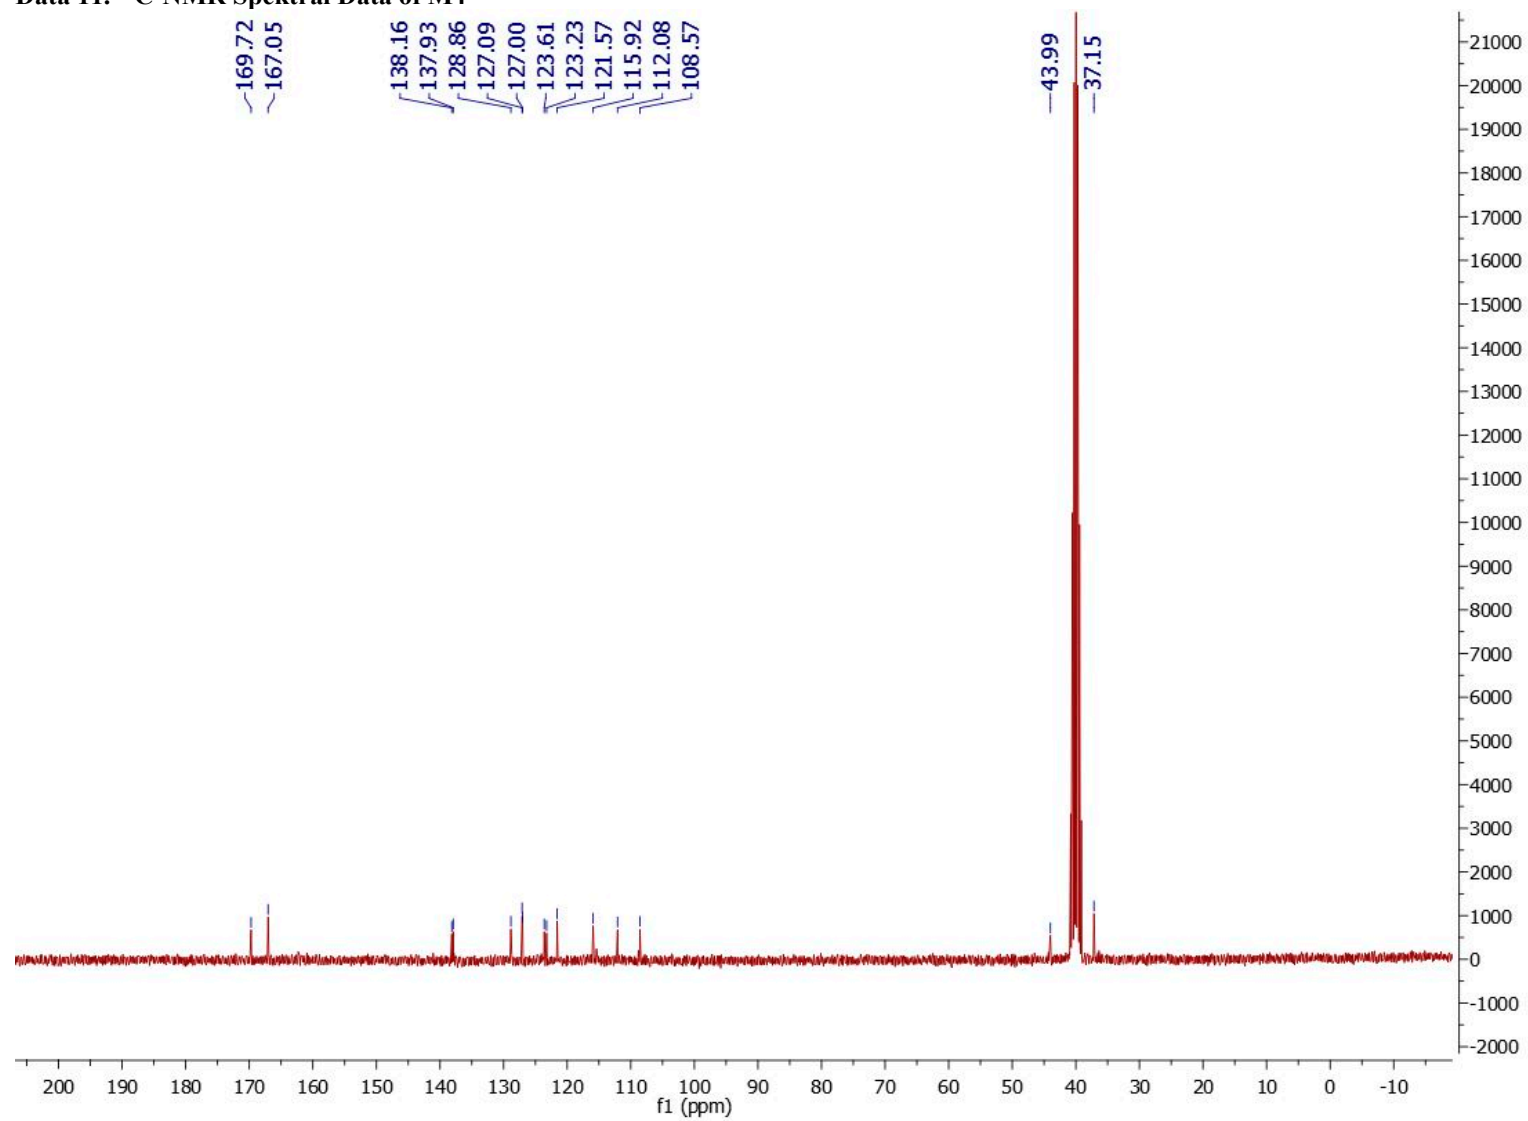

## Data 12. Mass Spectrum Data of M4

### Single Mass Analysis

Tolerance = 5.0 PPM / DBE: min = -1.5, max = 50.0

Element prediction: Off

Number of isotope peaks used for i-FIT = 3

Monoisotopic Mass, Even Electron Ions

26 formula(e) evaluated with 1 results within limits (up to 50 best isotopic matches for each mass)

Elements Used:

| Mass     | Calc. Mass | mDa  | PPM  | DBE  | Formula         | i-FIT | i-FIT (Norm) | C  | H  | N | O | S |
|----------|------------|------|------|------|-----------------|-------|--------------|----|----|---|---|---|
| 315.0905 | 315.0916   | -1.1 | -3.5 | 10.5 | C15 H15 N4 O2 S | 98.0  | 0.0          | 15 | 15 | 4 | 2 | 1 |

T584 94 (3.682) Cm (93:94)

1: TOF MS ES+

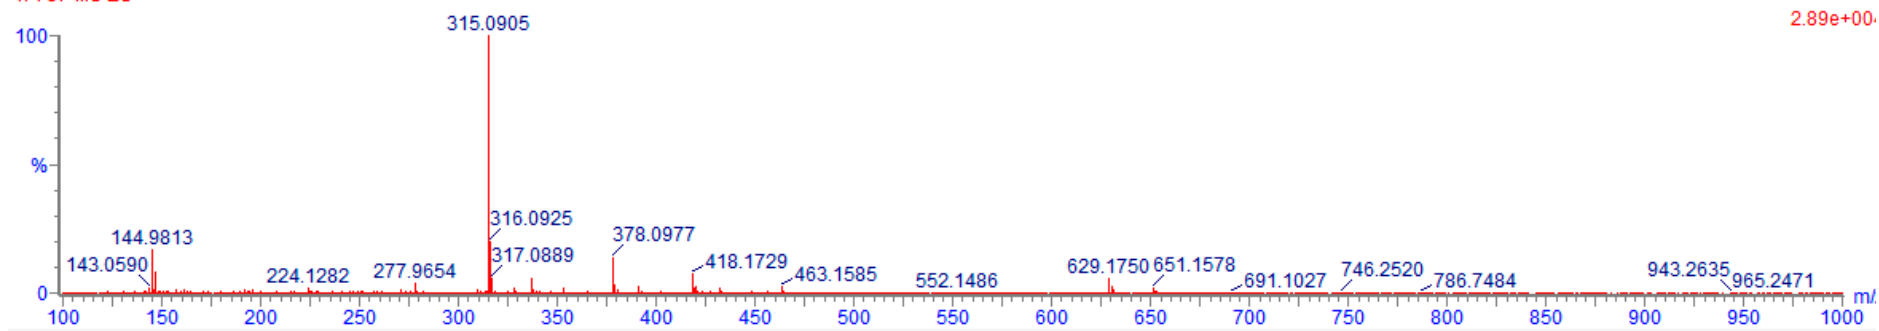

T584

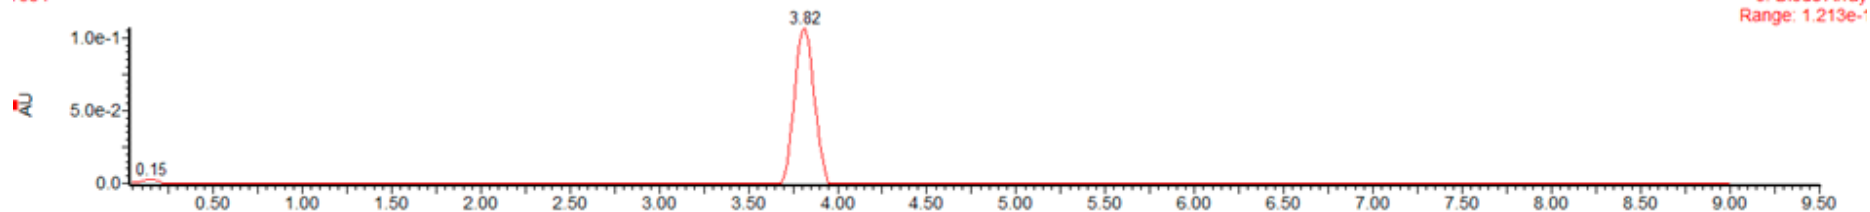

**Data 13. <sup>1</sup>H-NMR Spektral Data of M5**

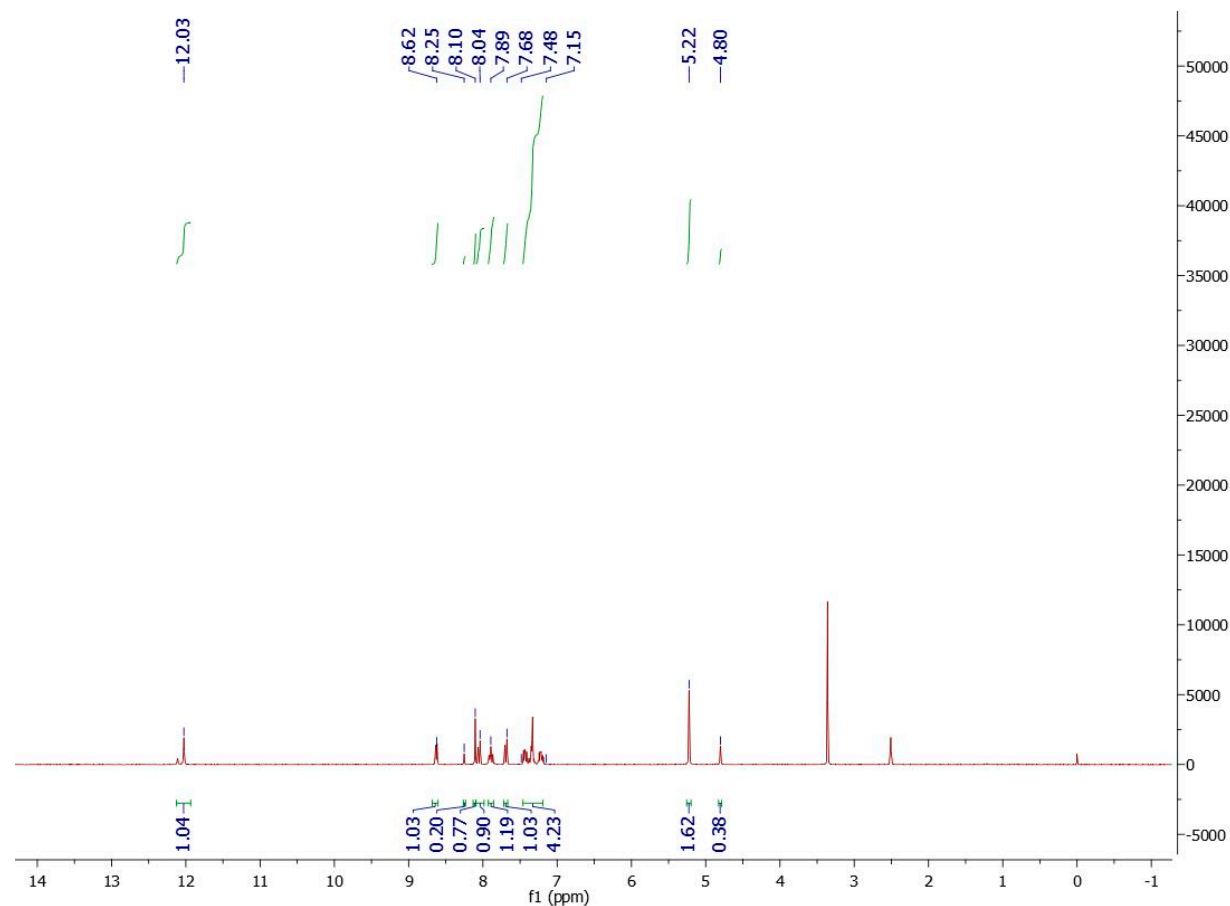

*E/Z*;81/19%)-N'-(pyridin-2-ylmethylene)-2-(2-oxobenzo[d]thiazol-3(2H)-yl)- acetohydrazide (**M5**)

Yield: 68%; mp: 228-30 °C, white powder. <sup>1</sup>H NMR (400 MHz, DMSO-d): δ 4.80 (s, 2H, -CH<sub>2</sub>, %19), 5.08 (s, 2H, -CH<sub>2</sub>, %81), 7.15–7.48 (m, 4H, benzothiazolone), 8.10 (s, H, N=CH, %81), 8.22 (s, H, N=CH, %19), 7.68-8.22 (m, 4H, pyridin), 12.03 (s, H, NH). <sup>13</sup>C NMR (100 MHz, DMSO-d) δ 169.72, 168.06, 153.22, 150.00, 145.26, 137.89, 137.31, 127.06, 124.93, 123.67, 123.27, 121.58, 120.42, 112.09, 44.03. HRMS (ESI): *m/z* calcd for C<sub>15</sub>H<sub>13</sub>N<sub>4</sub>O<sub>2</sub>S [M+H]<sup>+</sup> 313.0759; found: 313.0746.

Data 14.  $^{13}\text{C}$ -NMR Spektral Data of M5

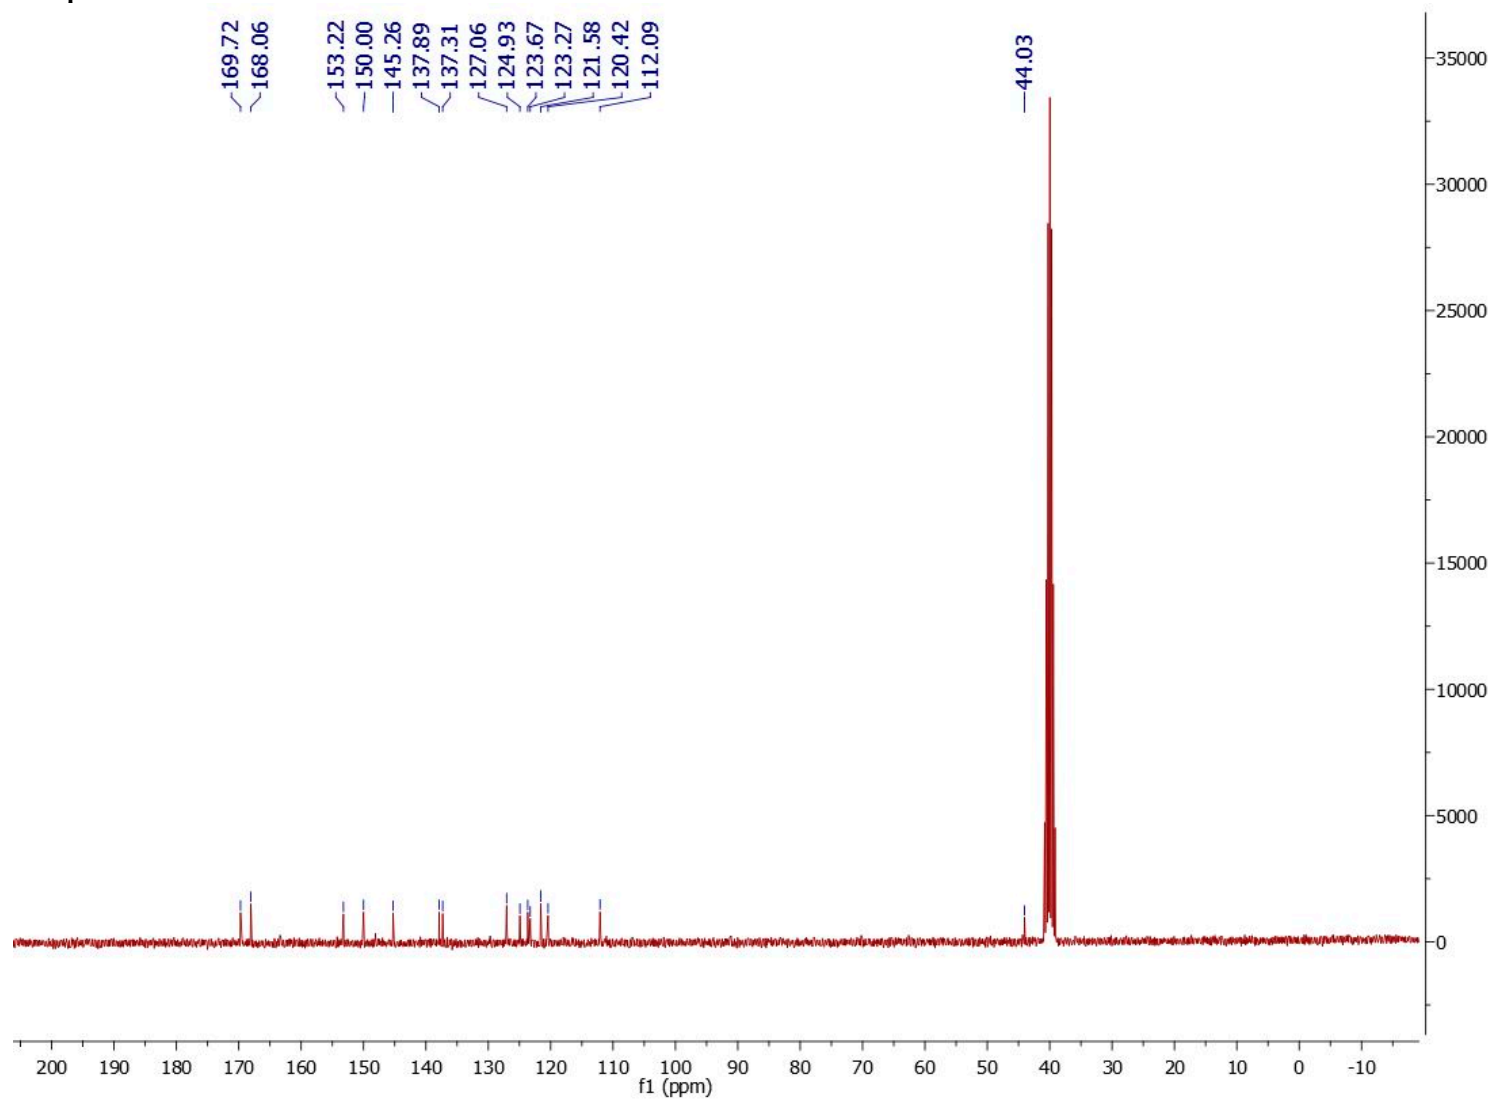

## Data 15. Mass Spectrum Data of M5

### Single Mass Analysis

Tolerance = 5.0 PPM / DBE: min = -1.5, max = 50.0

Element prediction: Off

Number of isotope peaks used for i-FIT = 3

Monoisotopic Mass, Even Electron Ions

24 formula(e) evaluated with 1 results within limits (up to 50 best isotopic matches for each mass)

Elements Used:

| Mass     | Calc. Mass | mDa  | PPM  | DBE  | Formula         | i-FIT | i-FIT (Norm) | C  | H  | N | O | S |
|----------|------------|------|------|------|-----------------|-------|--------------|----|----|---|---|---|
| 313.0746 | 313.0759   | -1.3 | -4.2 | 11.5 | C15 H13 N4 O2 S | 147.2 | 0.0          | 15 | 13 | 4 | 2 | 1 |

T585 77 (3.024) Cm (77:78)

1: TOF MS ES+

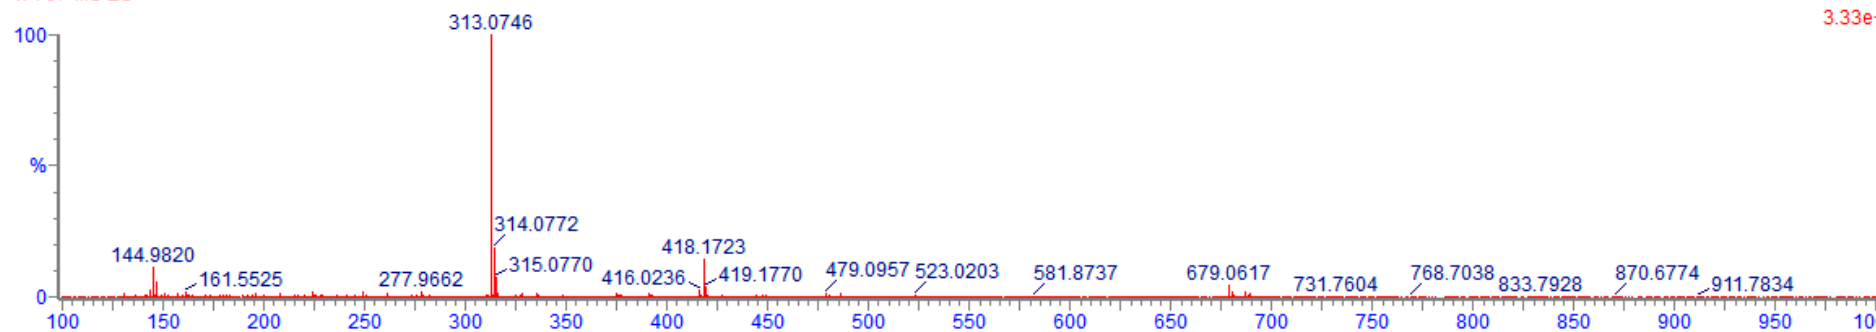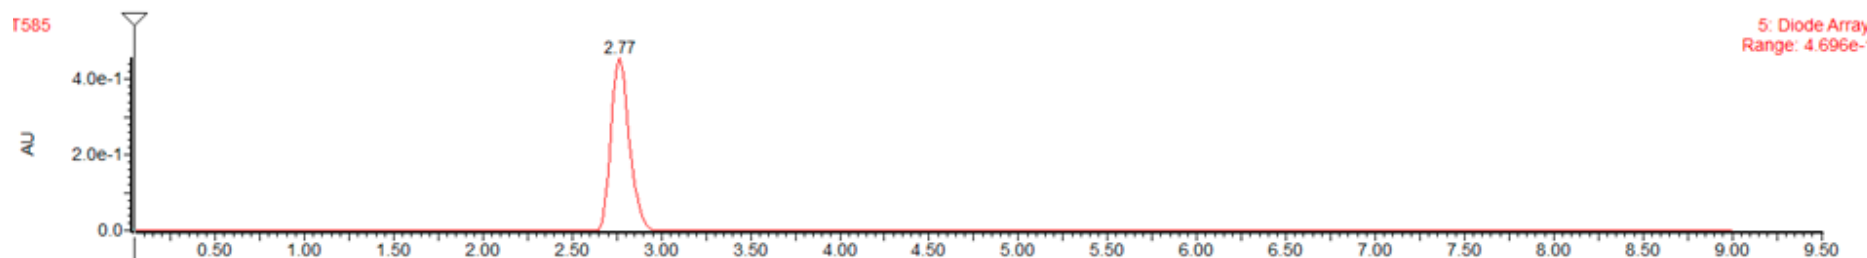



**Data 16.  $^1\text{H}$ -NMR Spektral Data of M6**

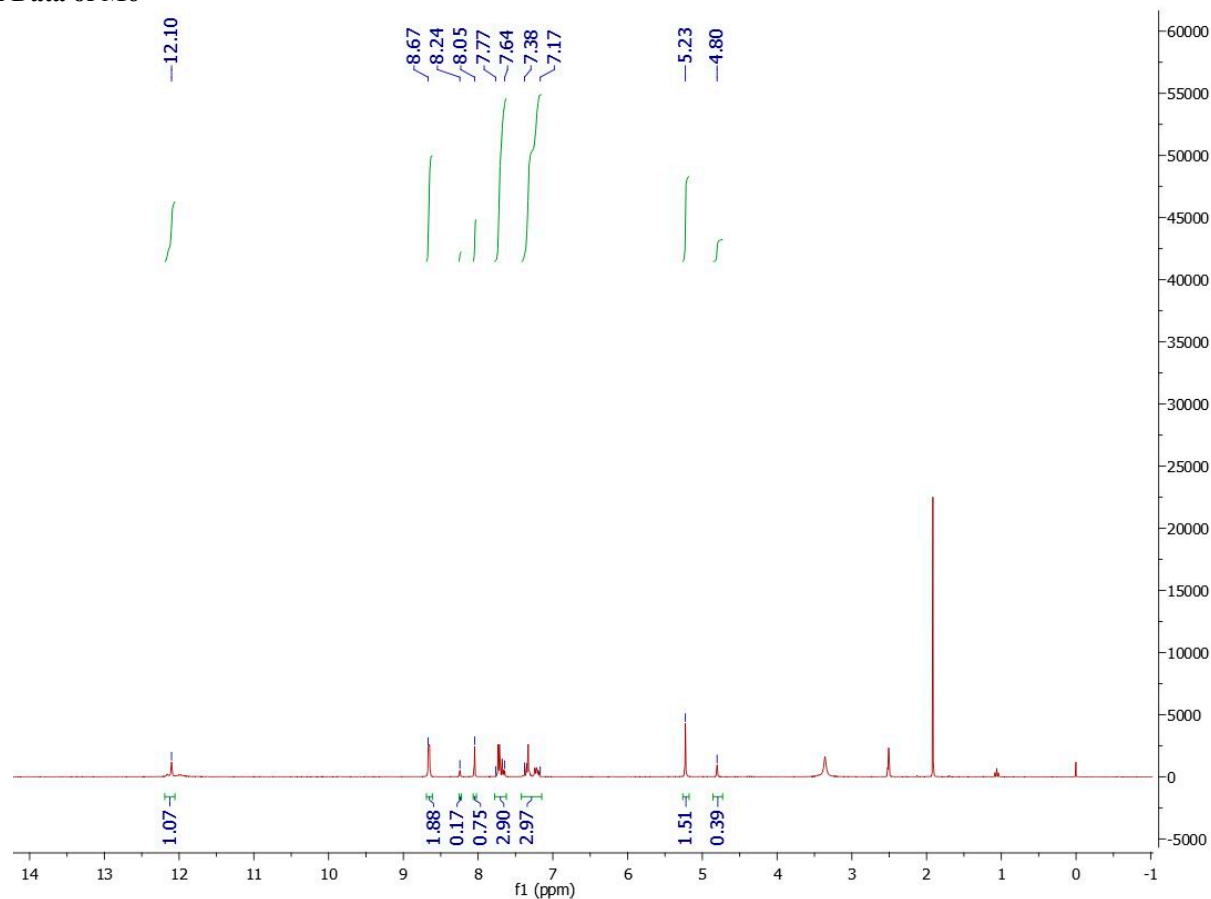

(*E/Z*;81/19%)-*N'*-(pyridin-4-ylmethylene)-2-(2-oxobenzo[d]thiazol-3(2H)-yl) acetohydrazide (**M6**)

Yield: 71%; mp:162-4°C, white powder.  $^1\text{H}$  NMR (400 MHz, DMSO-*d*):  $\delta$  4.80 (s, 2H, -CH<sub>2</sub>, %19), 5.23 (s, 2H, -CH<sub>2</sub>, %81), 7.17–7.38 (m, 3H), 7.64–7.77 (m, 3H), 8.05 (s, H, N=CH, %81), 8.24 (s, H, N=CH, %19), 8.67 (m, 2H), 12.10 (s, H, NH).  $^{13}\text{C}$  NMR (100 MHz, DMSO-*d*)  $\delta$  172.50, 169.72, 168.27, 150.71, 142.39, 141.51, 137.87, 127.06, 123.29, 121.59, 121.44, 112.08, 44.07. HRMS (ESI): *m/z* calcd for C<sub>15</sub>H<sub>13</sub>N<sub>4</sub>O<sub>2</sub>S [M+H]<sup>+</sup> 313.0759; found: 313.0752.

Data 17.  $^{13}\text{C}$ -NMR Spektral Data of M6

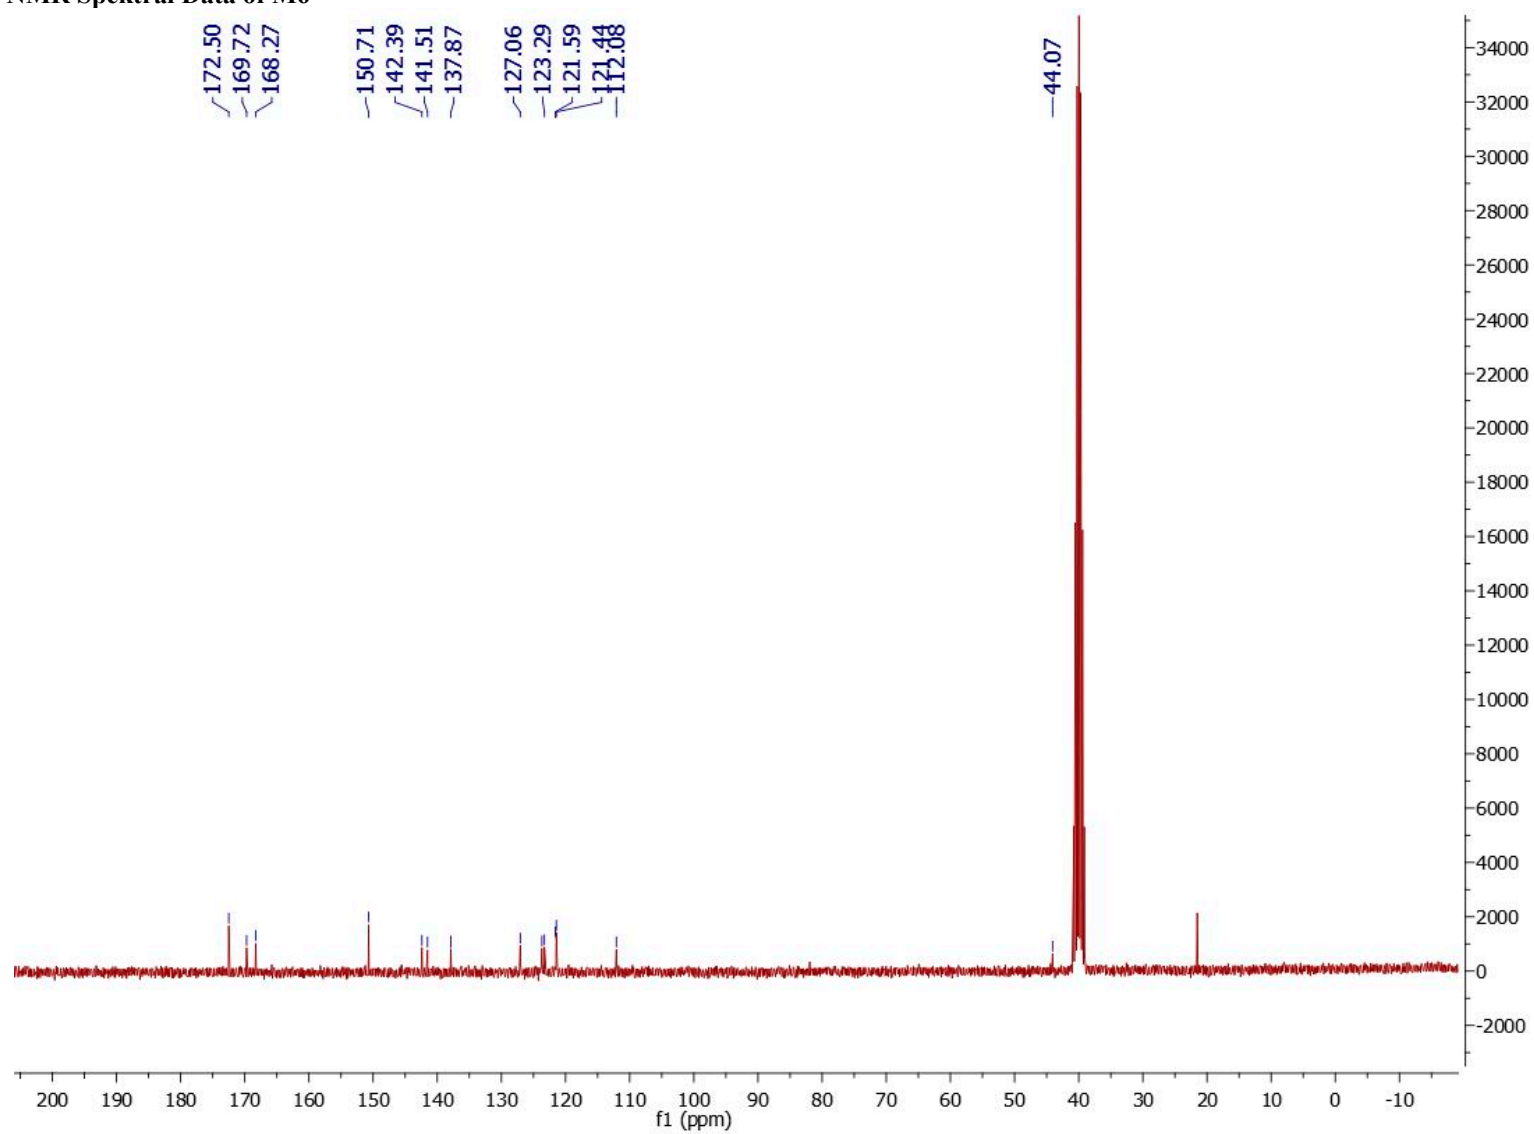

## Data 18. Mass Spectrum Data of M6

### Single Mass Analysis

Tolerance = 5.0 PPM / DBE: min = -1.5, max = 50.0

Element prediction: Off

Number of isotope peaks used for i-FIT = 3

Monoisotopic Mass, Even Electron Ions

24 formula(e) evaluated with 1 results within limits (up to 50 best isotopic matches for each mass)

Elements Used:

| Mass     | Calc. Mass | mDa  | PPM  | DBE  | Formula         | i-FIT | i-FIT (Norm) | C  | H  | N | O | S |
|----------|------------|------|------|------|-----------------|-------|--------------|----|----|---|---|---|
| 313.0752 | 313.0759   | -0.7 | -2.2 | 11.5 | C15 H13 N4 O2 S | 237.8 | 0.0          | 15 | 13 | 4 | 2 | 1 |

T586 57 (2.241) Cm (57:58)

1: TOF MS ES+

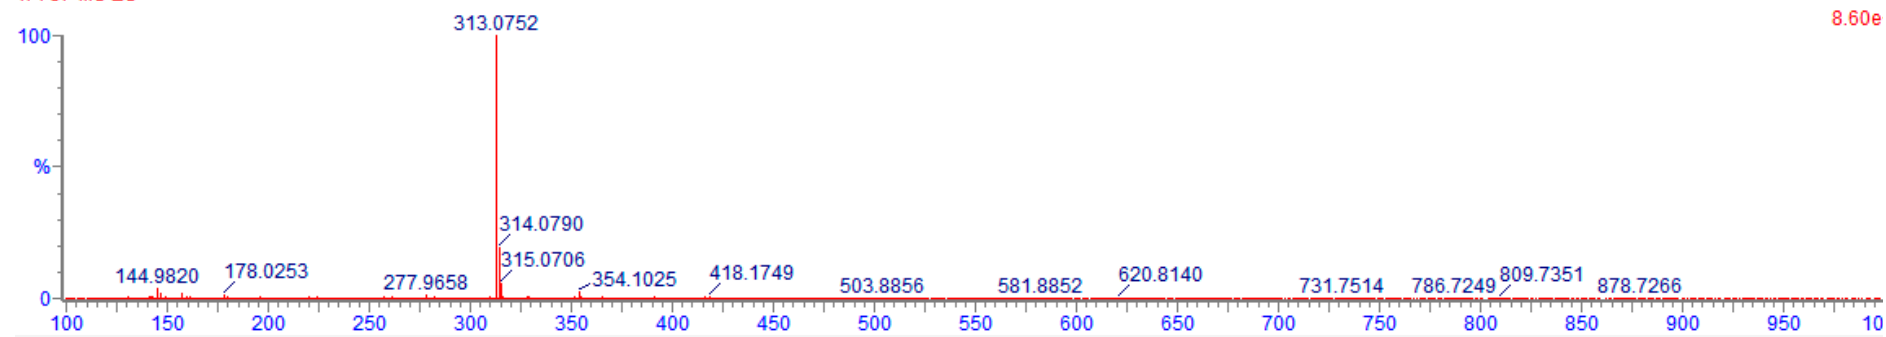

T586

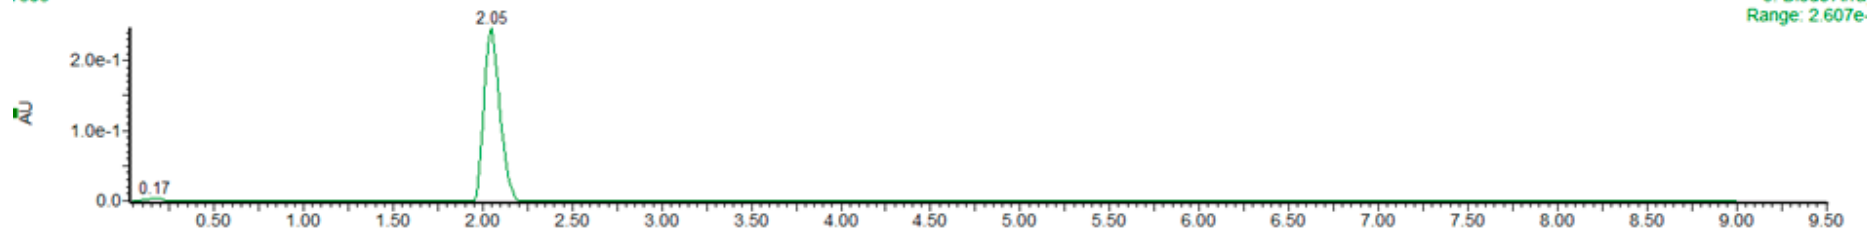

**Data 19. <sup>1</sup>H-NMR Spektral Data of M7**

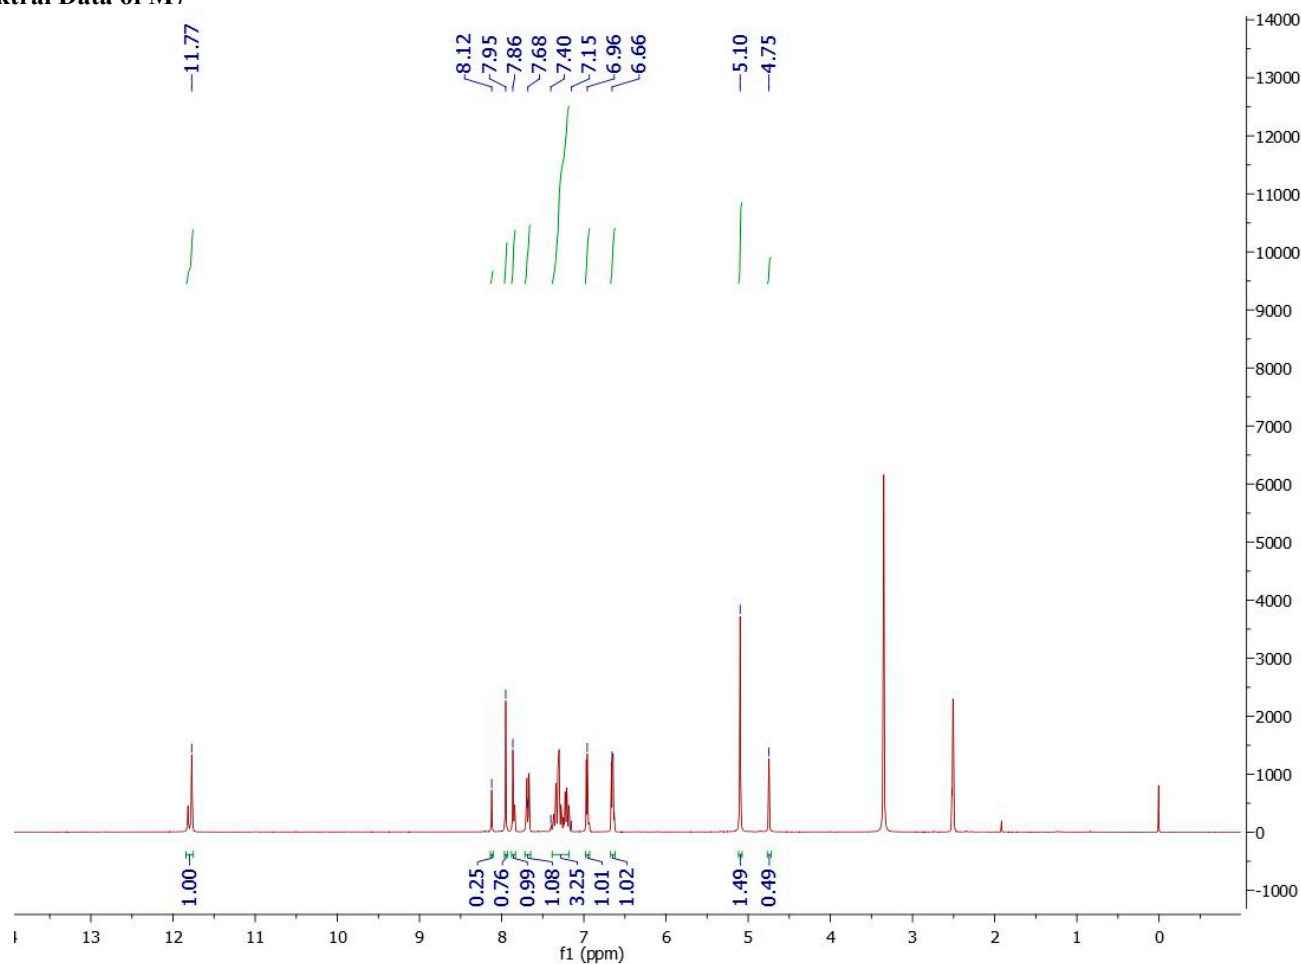

(*E/Z*;75/25%)-N'-(furan-2-ylmethylene)-2-(2-oxobenzo[d]thiazol-3(2H)-yl) acetohydrazide (**M7**)

Yield: 71%; mp: 216-7 °C, white powder. <sup>1</sup>H NMR (400 MHz, DMSO-d<sub>6</sub>): δ 4.75 (s, 2H, -CH<sub>2</sub>, %25), 5.08 (s, 2H, -CH<sub>2</sub>, %75), 6.66 (m, H, furan), 6.96 (m, H, furan), 7.15–7.40 (m, 3H, benzothiazolone), 7.68 (m, H), 7.86 (m, H), 7.95 (s, H, N=CH, %75), 8.12 (s, H, N=CH, %25), 11.77 (s, H, NH). <sup>13</sup>C NMR (100 MHz, DMSO-d<sub>6</sub>) δ 169.68, 167.59, 149.38, 145.67, 137.95, 134.91, 127.03, 123.61, 123.22, 121.55, 114.44, 112.68, 112.12, 43.83. HRMS (ESI): *m/z* calcd for C<sub>14</sub>H<sub>12</sub>N<sub>3</sub>O<sub>3</sub>S [M+H]<sup>+</sup> 302.0599; found: 302.0586.

Data 20.  $^{13}\text{C}$ -NMR Spektral Data of M7

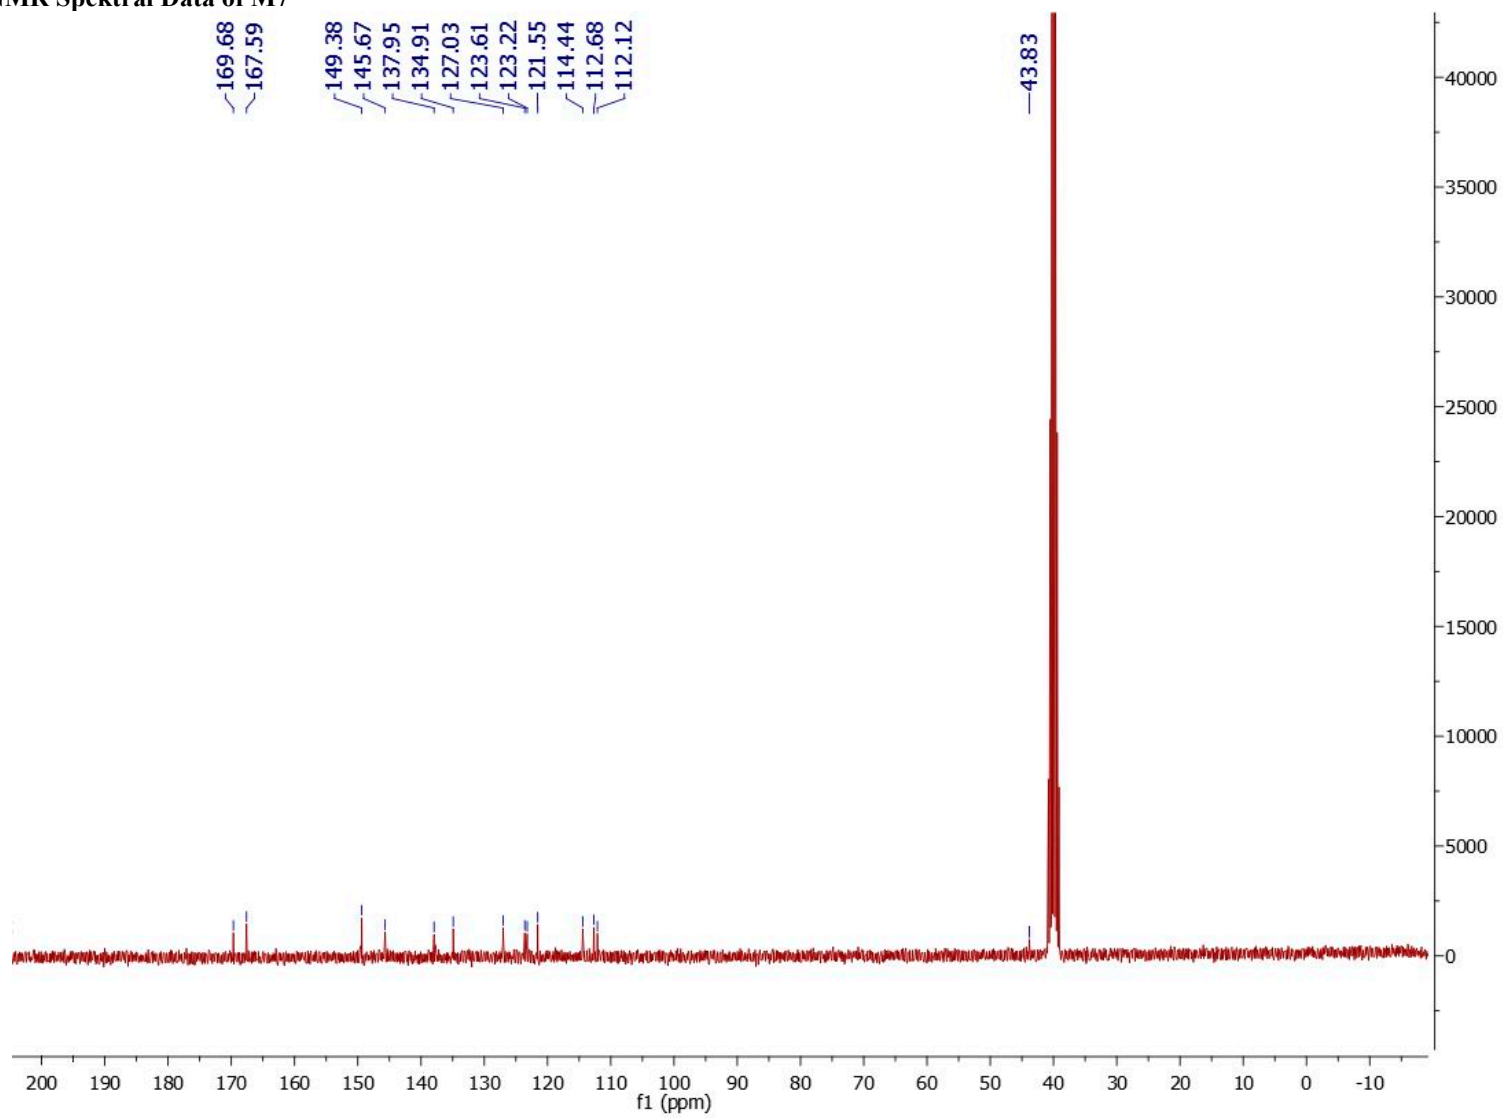

## Data 21. Mass Spectrum Data of M7

### Single Mass Analysis

Tolerance = 5.0 PPM / DBE: min = -1.5, max = 50.0

Element prediction: Off

Number of isotope peaks used for i-FIT = 3

Monoisotopic Mass, Even Electron Ions

28 formula(e) evaluated with 1 results within limits (up to 50 best isotopic matches for each mass)

Elements Used:

| Mass     | Calc. Mass | mDa  | PPM  | DBE  | Formula         | i-FIT | i-FIT (Norm) | C  | H  | N | O | S |
|----------|------------|------|------|------|-----------------|-------|--------------|----|----|---|---|---|
| 302.0586 | 302.0599   | -1.3 | -4.3 | 10.5 | C14 H12 N3 O3 S | 576.6 | 0.0          | 14 | 12 | 3 | 3 | 1 |

T587 86 (3.369) Cm (83:90)

1: TOF MS ES+

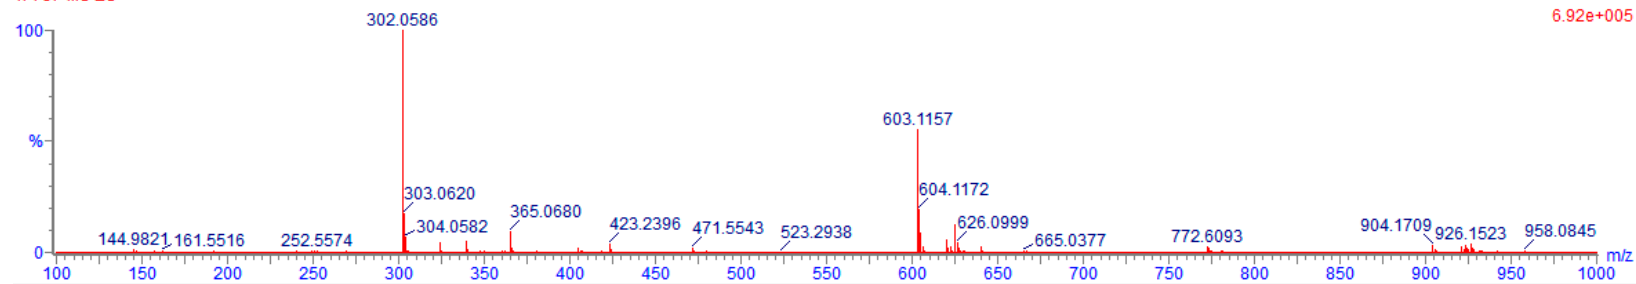

T587

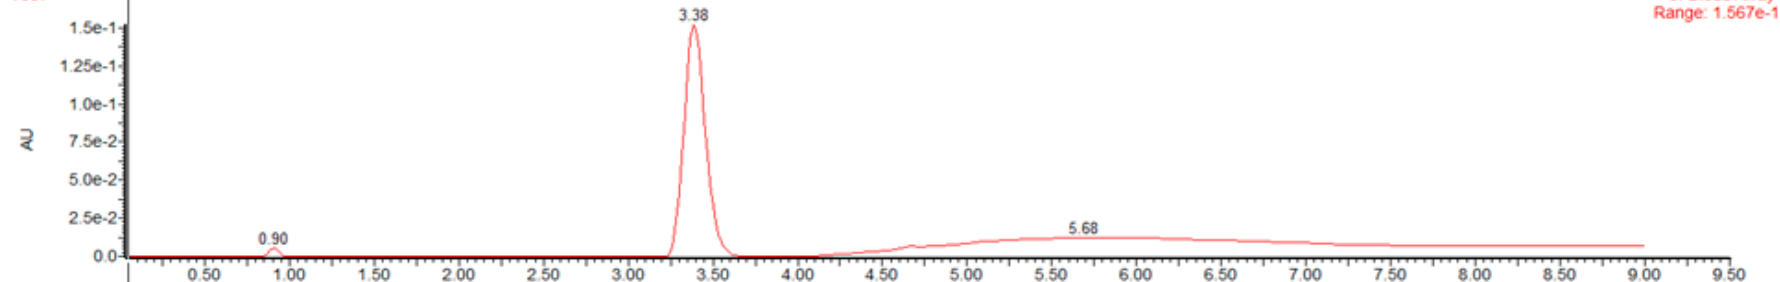

**Data 22.  $^1\text{H}$ -NMR Spektral Data of M8**

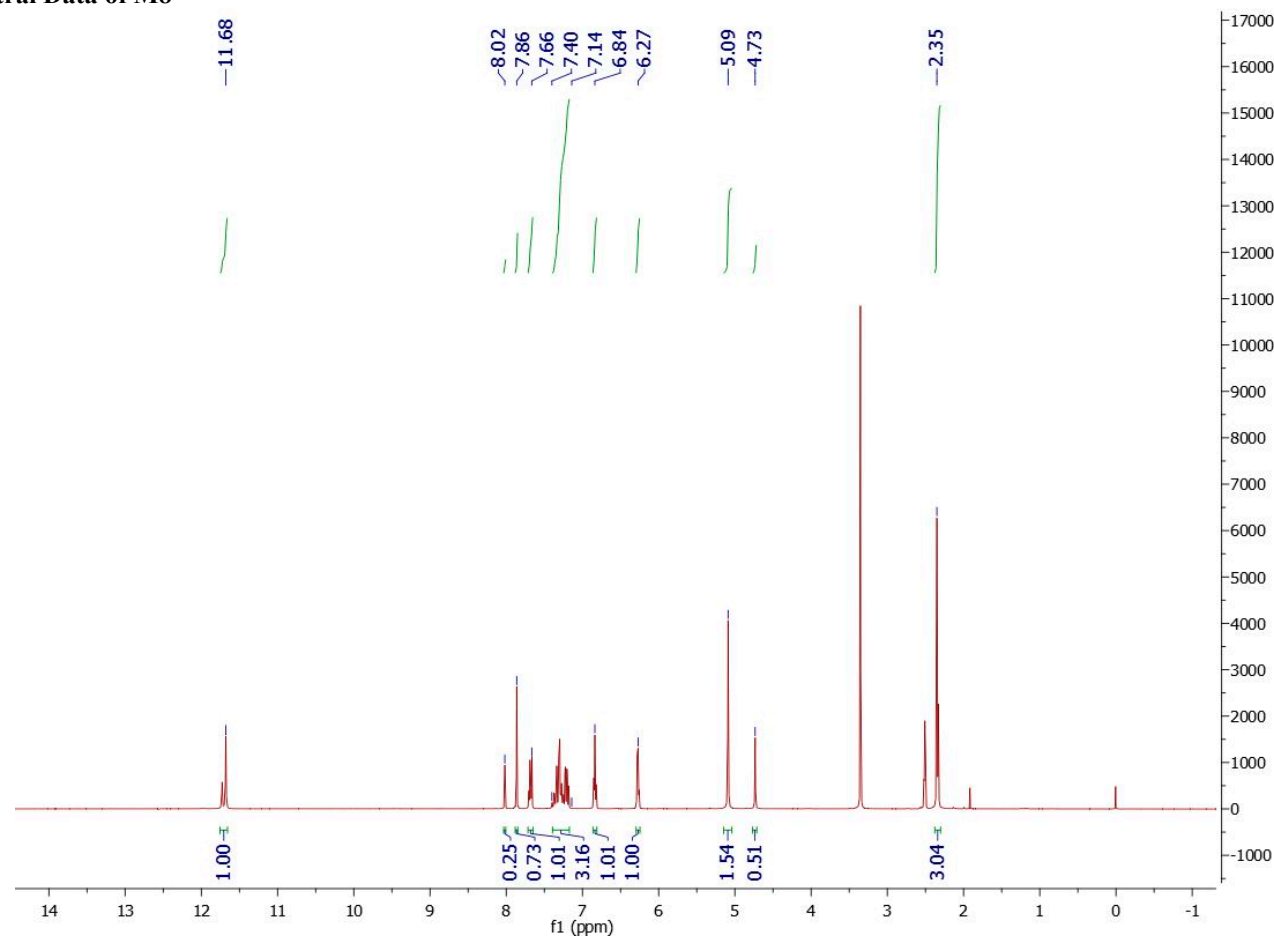

(*E/Z*; 75/25%)-*N'*-((5-methylfuran-2-yl)methylene)-2-(2-oxobenzo[d]thiazol-3(2H)-yl) acetohydrazide (**M8**)

Yield: 80%; mp: 238-40 °C, white powder.  $^1\text{H}$  NMR (400 MHz, DMSO- $d_6$ ):  $\delta$  2.35 (s, 3H,  $\text{CH}_3$ ), 4.73 (s, 2H,  $-\text{CH}_2$ , %25), 5.09 (s, 2H,  $-\text{CH}_2$ , %75), 6.27 (m, H, furan), 6.84 (m, H, furan), 7.14–7.40 (m, 3H, benzothiazolone), 7.66 (m, H, benzothiazolone), 7.86 (s, H,  $\text{N}=\text{CH}$ , %75), 8.02 (s, H,  $\text{N}=\text{CH}$ , %25), 11.77 (s, H, NH).  $^{13}\text{C}$  NMR (100 MHz, DMSO- $d_6$ )  $\delta$  169.68, 167.43, 155.13, 147.98, 147.89, 137.98, 134.99, 127.01, 123.58, 123.19, 121.55, 116.22, 112.14, 109.09, 43.86, 14.01. HRMS (ESI):  $m/z$  calcd for  $\text{C}_{15}\text{H}_{14}\text{N}_3\text{O}_3\text{S}$   $[\text{M}+\text{H}]^+$  316.0756; found: 316.0742.

**Data 23.  $^{13}\text{C}$ -NMR Spektral Data of M8**

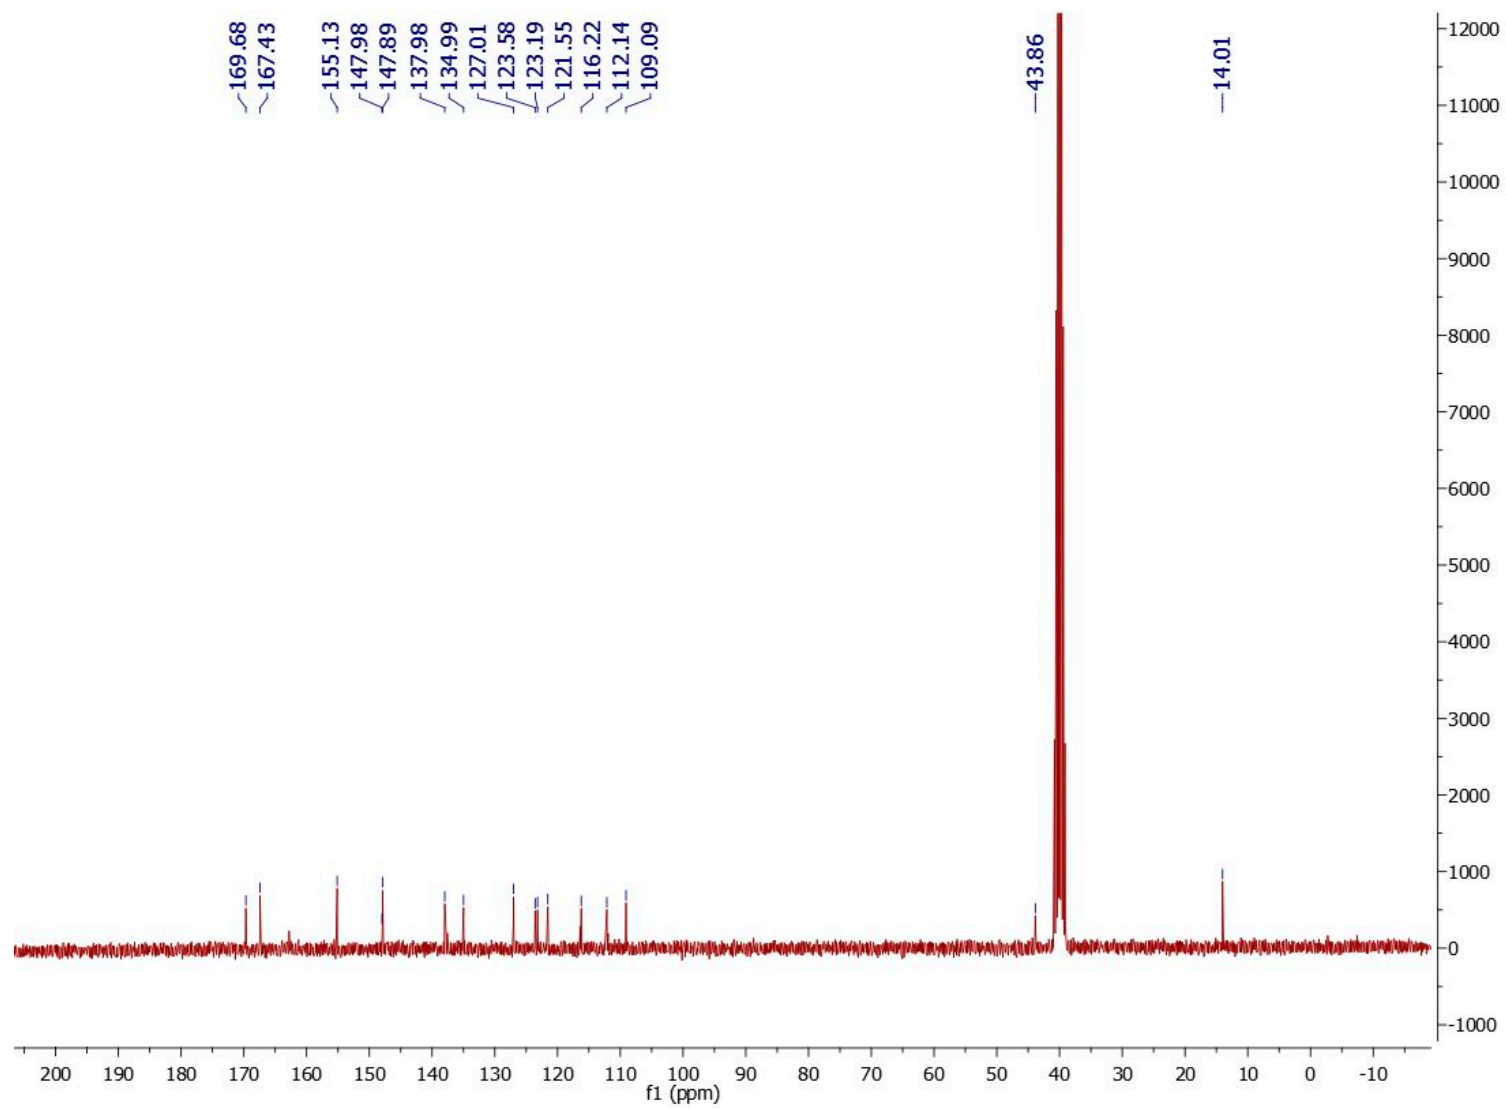



## Data 24. Mass Spectrum Data of M8

### Single Mass Analysis

Tolerance = 5.0 PPM / DBE: min = -1.5, max = 50.0

Element prediction: Off

Number of isotope peaks used for i-FIT = 3

Monoisotopic Mass, Even Electron Ions

28 formula(e) evaluated with 1 results within limits (up to 50 best isotopic matches for each mass)

Elements Used:

| Mass     | Calc. Mass | mDa  | PPM  | DBE  | Formula         | i-FIT | i-FIT (Norm) | C  | H  | N | O | S |
|----------|------------|------|------|------|-----------------|-------|--------------|----|----|---|---|---|
| 316.0742 | 316.0756   | -1.4 | -4.4 | 10.5 | C15 H14 N3 O3 S | 331.4 | 0.0          | 15 | 14 | 3 | 3 | 1 |

T588\_2 99 (3.873) Cm (99:101)

1: TOF MS ES+

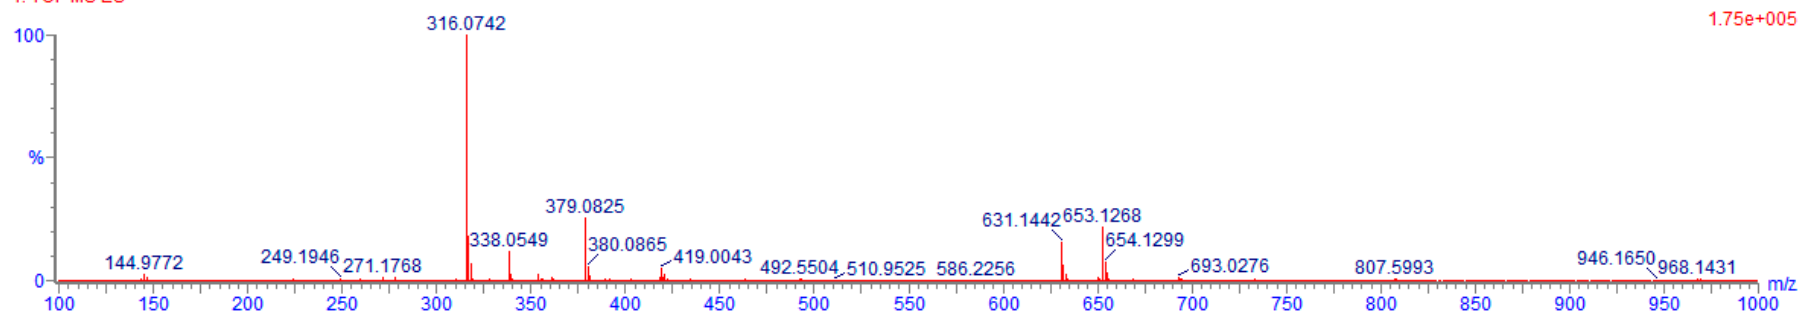

T588\_2

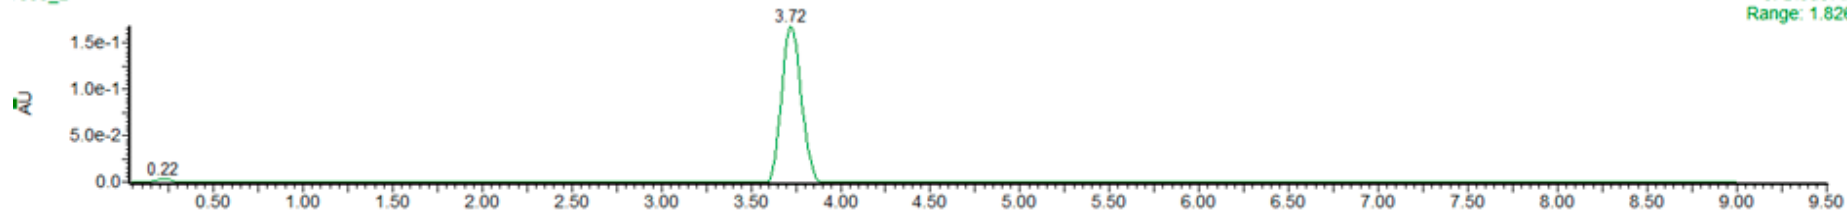

**Data 25. <sup>1</sup>H-NMR Spektral Data of M9**

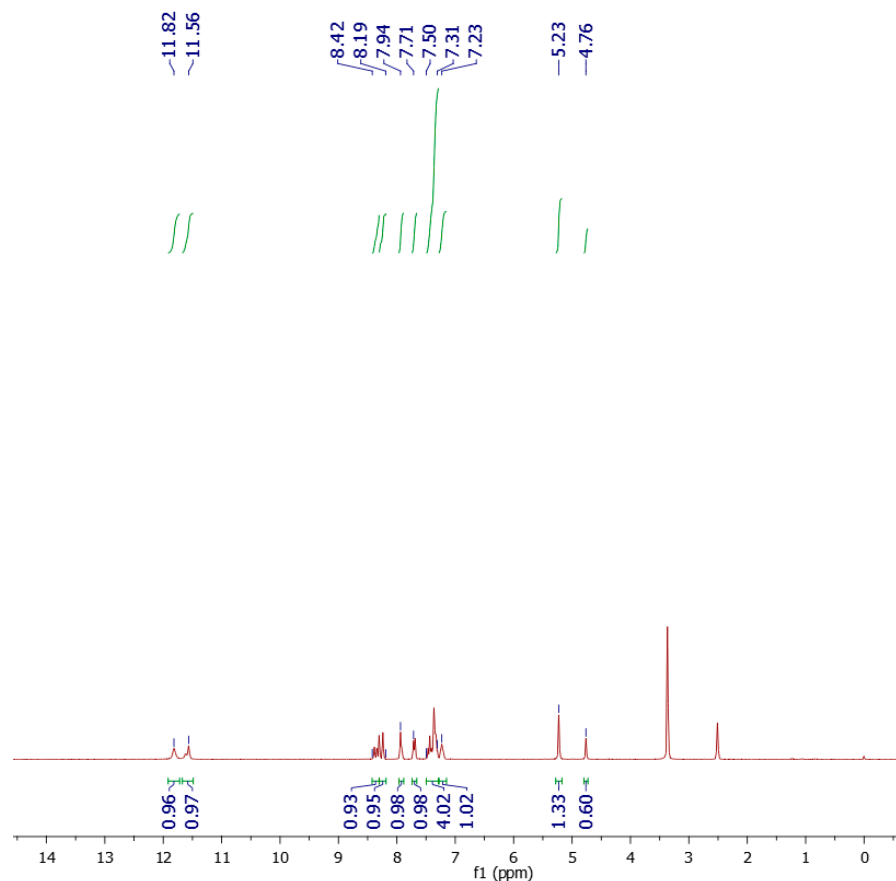

(*E/Z*;69/31%)-N'-((5-bromo-1H-indol-3-yl)methylene)-2-(2-oxobenzo[d]thiazol-3(2H)-yl) acetohydrazide (**M9**)

Yield: 67%; mp: 268-9 °C, white powder. <sup>1</sup>H NMR (400 MHz, DMSO-d): δ 4.76 (s, 2H, -CH<sub>2</sub>, %31), 5.23 (s, 2H, -CH<sub>2</sub>, %69), 7.23-7.50 (m, 5H), 7.71 (m, H), 7.94 (m, H), 8.19 (m, H), 8.42 (m, H), 11.56 (s, H, NH), 11.82 (s, H, NH). <sup>13</sup>C NMR (100 MHz, DMSO-d) δ 169.83, 166.85, 14.87, 138.02, 132.55, 127.02, 126.19, 125.70, 124.23, 123.63, 123.22, 121.56, 114.50, 113.70, 112.29, 111.24, 43.70. HRMS (ESI): *m/z* calcd for C<sub>18</sub>H<sub>14</sub>N<sub>4</sub>O<sub>2</sub>SBr [M+H]<sup>+</sup> 429.0021; found: 429.0011.

Data 26.  $^{13}\text{C}$ -NMR Spektral Data of M9

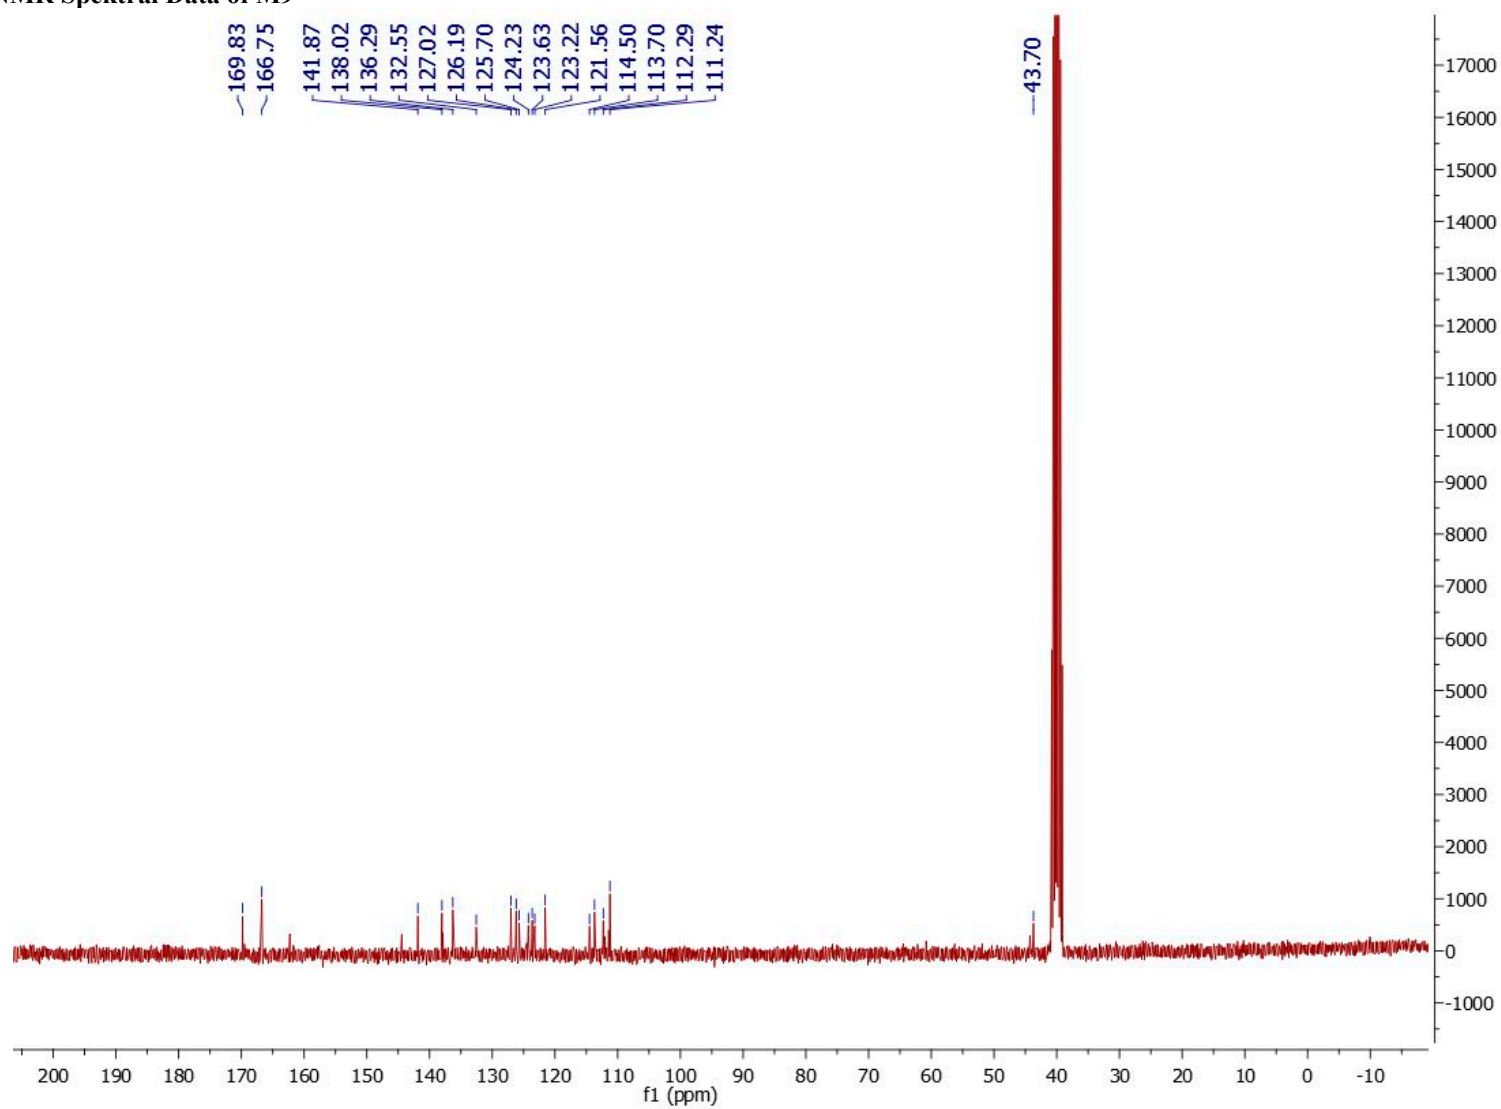

## Data 27. Mass Spectrum Data of M9

### Single Mass Analysis

Tolerance = 5.0 PPM / DBE: min = -1.5, max = 50.0

Element prediction: Off

Number of isotope peaks used for i-FIT = 3

Monoisotopic Mass, Even Electron Ions

191 formula(e) evaluated with 1 results within limits (up to 50 closest results for each mass)

Elements Used:

| Mass     | Calc. Mass | mDa  | PPM  | DBE  | Formula            | i-FIT | i-FIT (Norm) | C  | H  | N | O | S | Br |
|----------|------------|------|------|------|--------------------|-------|--------------|----|----|---|---|---|----|
| 429.0011 | 429.0021   | -1.0 | -2.3 | 13.5 | C18 H14 N4 O2 S Br | 55.1  | 0.0          | 18 | 14 | 4 | 2 | 1 | 1  |

T608KRS-18022021 276 (3.949)

1: TOF MS ES+

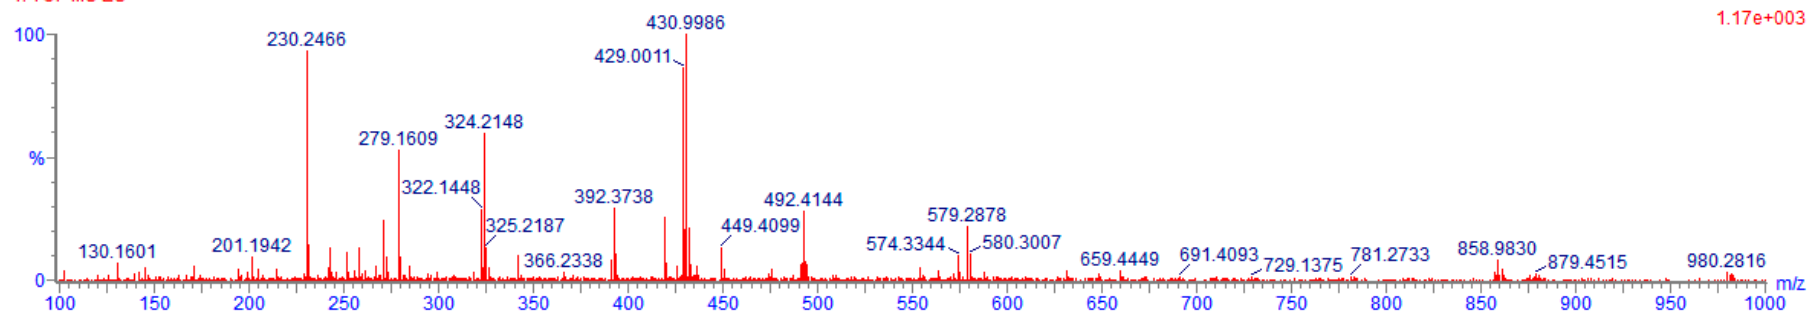

T608KRS-18022021

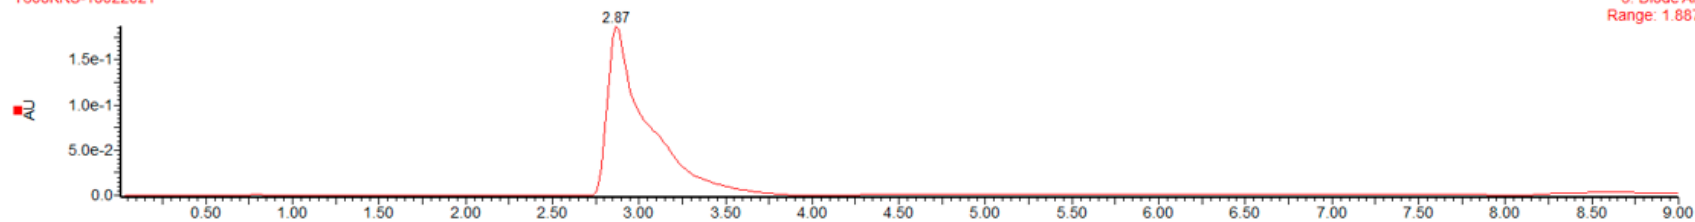

**Data 28.  $^1\text{H}$ -NMR Spektral Data of M10**

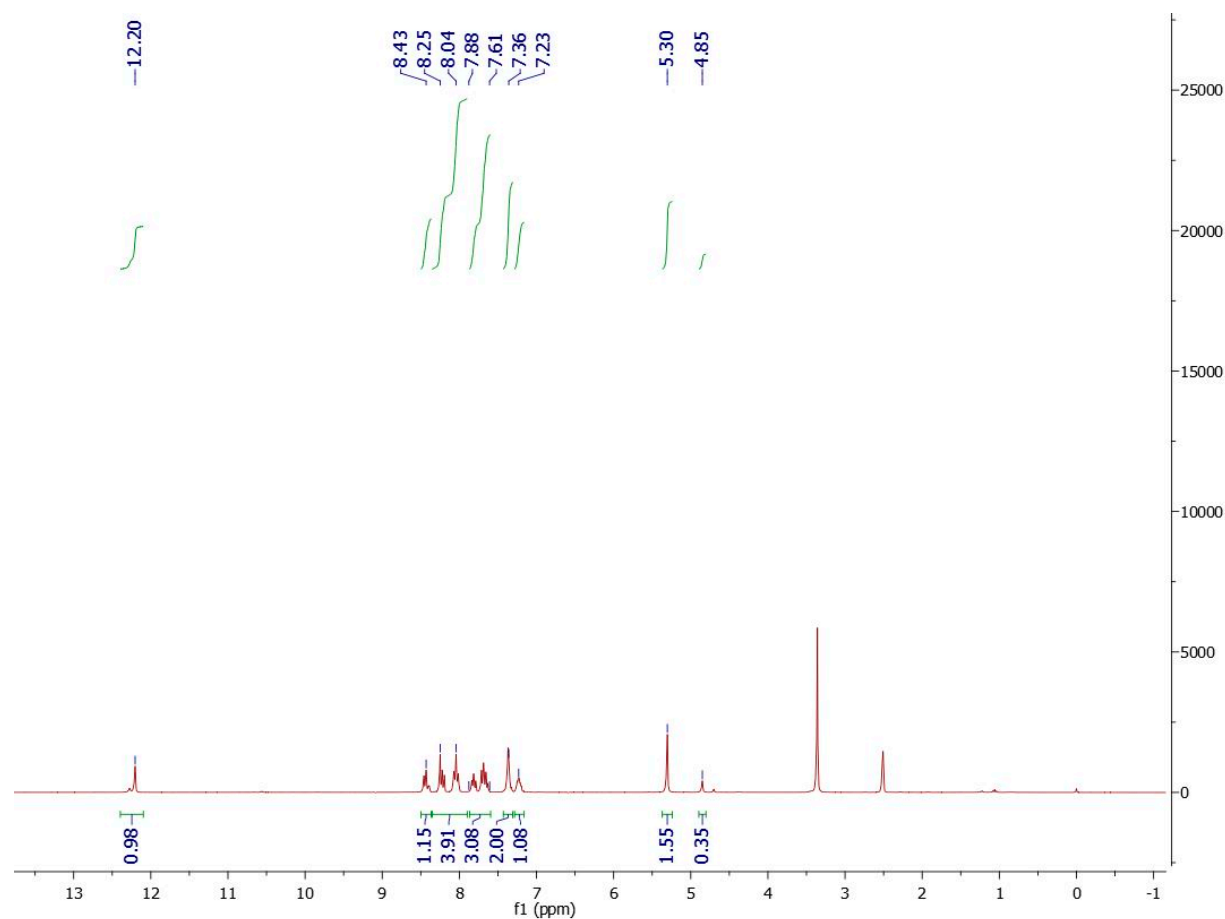

(E/Z;82/18)-N'-(quinolin-2-ylmethylene)-2-(2-oxobenzo[d]thiazol-3(2H)-yl)- acetohydrazide (**M10**)

Yield: 59%; mp: 271-2 °C, white powder.  $^1\text{H}$  NMR (400 MHz, DMSO- $d_6$ ):  $\delta$  4.85 (s, 2H,  $-\text{CH}_2$ , %18), 5.30 (s, 2H,  $-\text{CH}_2$ , %82), 7.23-7.36 (m, 3H), 7.61-7.88 (m, 3H), 8.04-8.25 (m, 4H), 8.43 (m, H,  $\text{N}=\text{CH}$ ), 12.20 (s, H, NH).  $^{13}\text{C}$  NMR (100 MHz, DMSO- $d_6$ )  $\delta$  169.75, 168.23, 153.70, 147.78, 145.34, 137.90, 137.20, 130.61, 129.38, 128.50, 127.86, 127.08, 123.69, 123.29, 121.60, 117.94, 112.13, 44.11. HRMS (ESI):  $m/z$  calcd for  $\text{C}_{19}\text{H}_{15}\text{N}_4\text{O}_2\text{S}$   $[\text{M}+\text{H}]^+$  363.0916; found: 363.0905.

Data 29.  $^{13}\text{C}$ -NMR Spektral Data of M10

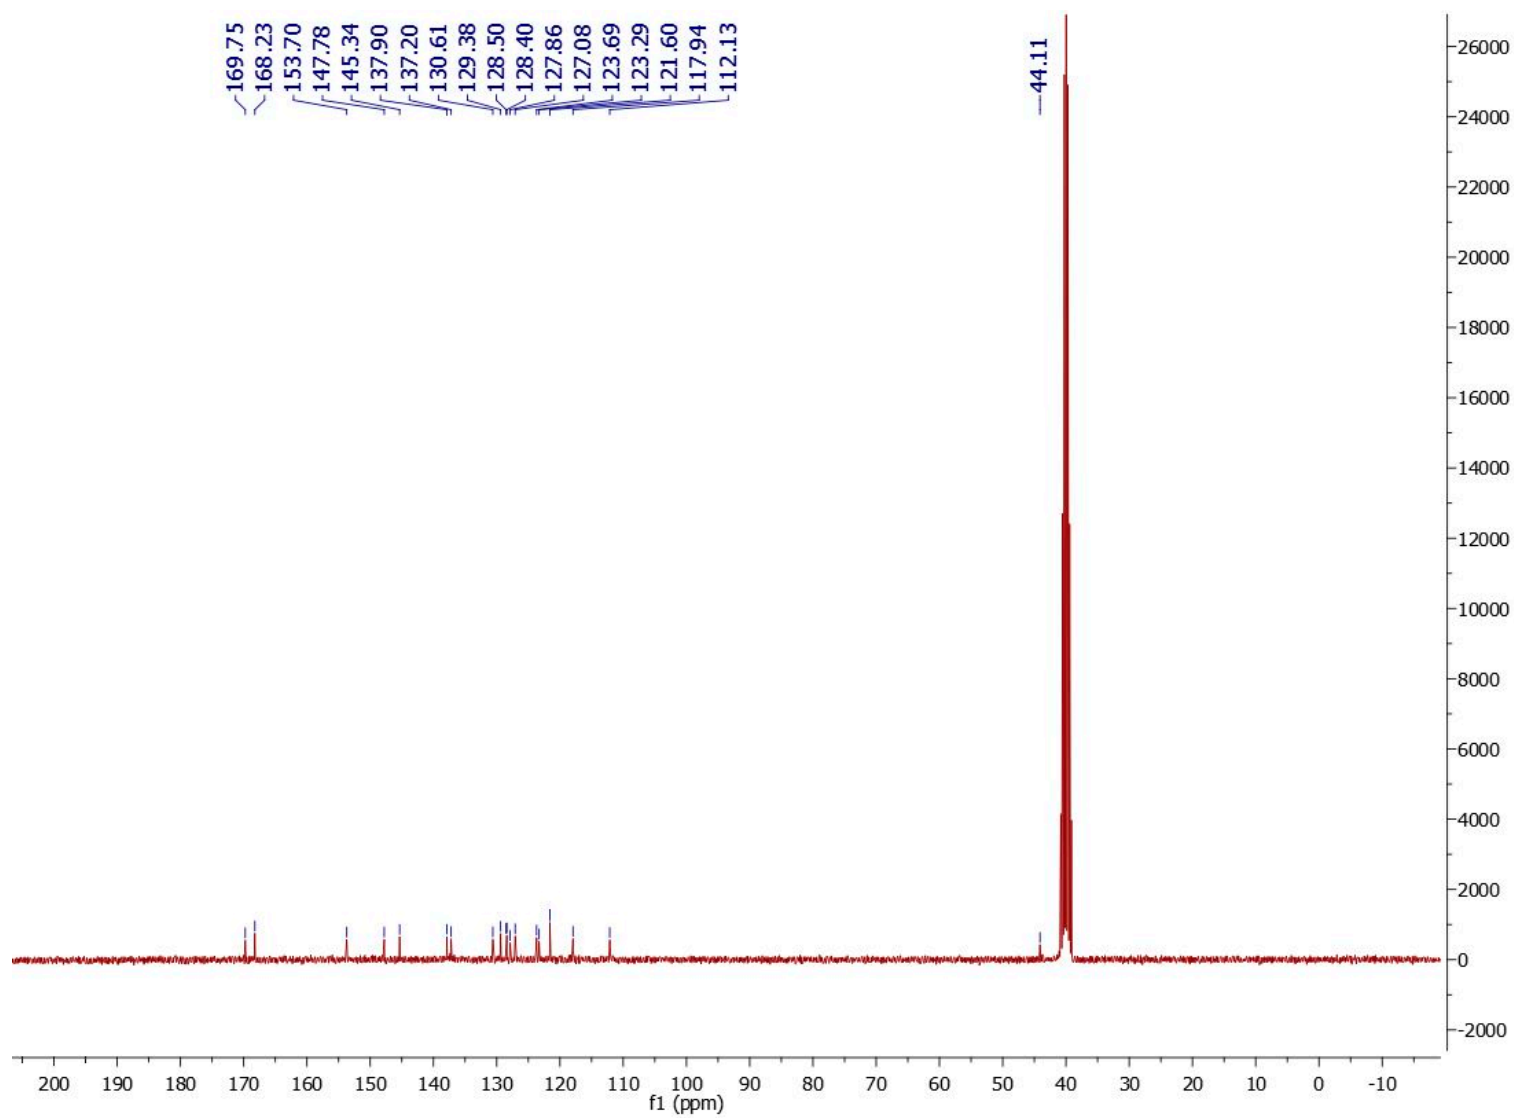

### Data 30. Mass Spectrum Data of M10

#### Single Mass Analysis

Tolerance = 5.0 PPM / DBE: min = -1.5, max = 50.0

Element prediction: Off

Number of isotope peaks used for i-FIT = 3

Monoisotopic Mass, Even Electron Ions

57 formula(e) evaluated with 1 results within limits (up to 50 closest results for each mass)

Elements Used:

| Mass     | Calc. Mass | mDa  | PPM  | DBE  | Formula         | i-FIT | i-FIT (Norm) | C  | H  | N | O | S |
|----------|------------|------|------|------|-----------------|-------|--------------|----|----|---|---|---|
| 363.0905 | 363.0916   | -1.1 | -3.0 | 14.5 | C19 H15 N4 O2 S | 596.1 | 0.0          | 19 | 15 | 4 | 2 | 1 |

T609-08022021 243 (3.478) Cm (243:248)

1: TOF MS ES+

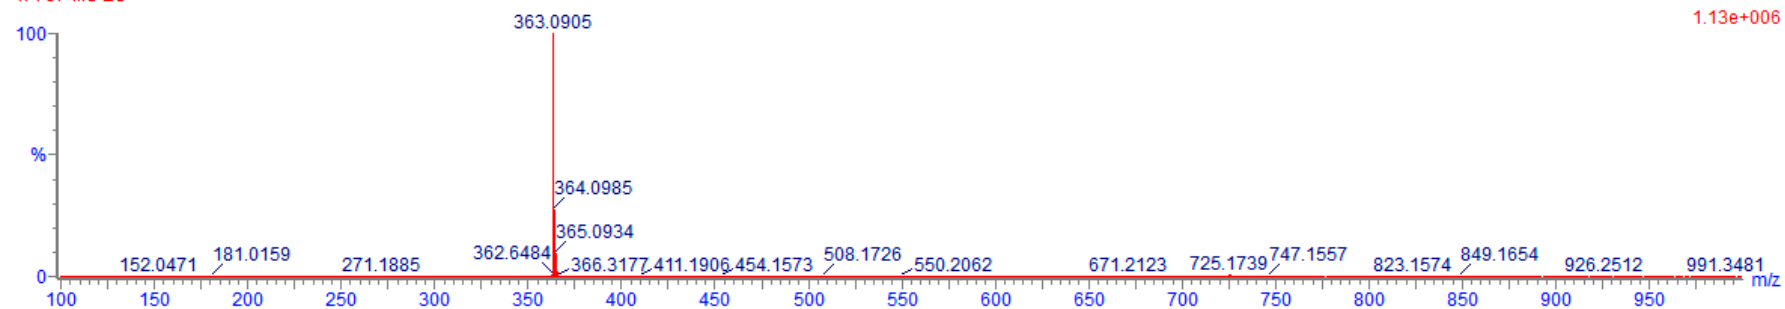

T609-08022021

3: Diode Array  
Range: 4.418e-1

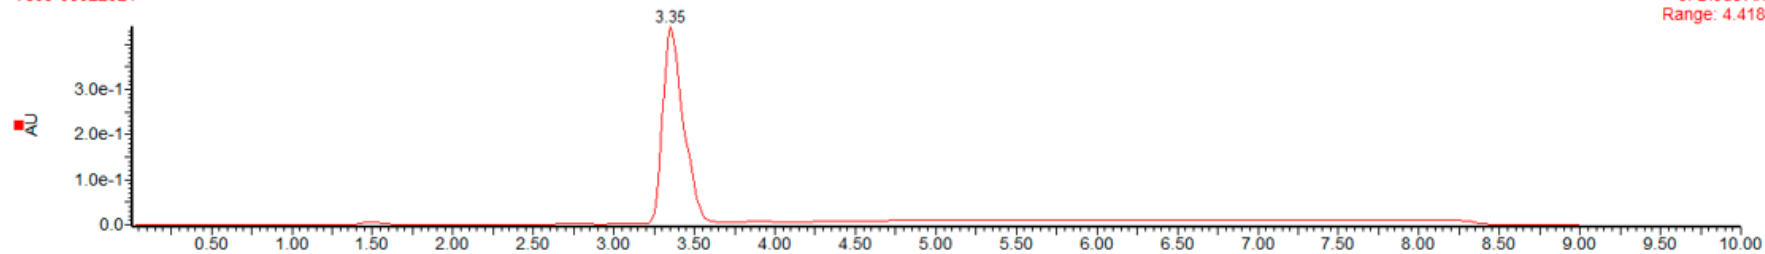

**Data 31. <sup>1</sup>H-NMR Spektral Data of M11**

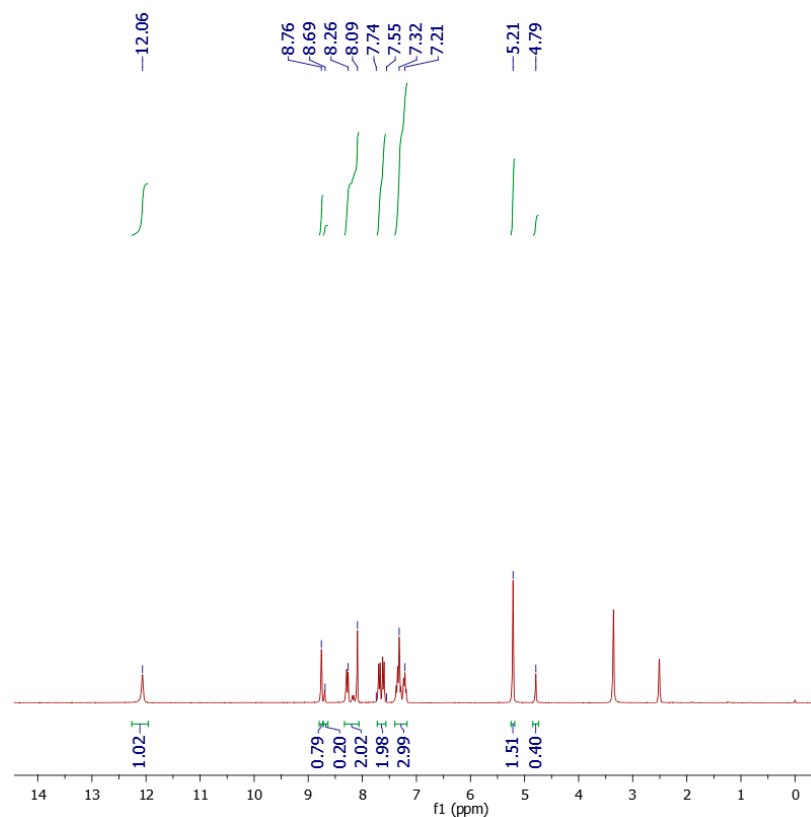

(E/Z;79/21)-N'-((6-chloropyridin-3-yl)methylene)-2-(2-oxobenzo[d]thiazol-3(2H)-yl) acetohydrazide (**M11**)

Yield: 75%; mp: 237-8 °C, white powder. <sup>1</sup>H NMR (400 MHz, DMSO-d<sub>6</sub>): δ 4.79 (s, 2H, -CH<sub>2</sub>, %21), 5.21 (s, 2H, -CH<sub>2</sub>, %79), 7.21-7.32 (m, 3H), 7.55-7.74 (m, 2H), 8.09-8.26 (m, 2H), 8.69 (m, H, N=CH, %21), 8.76 (m, H, N=CH, %79), 12.06 (s, H, NH). <sup>13</sup>C NMR (100 MHz, DMSO-d<sub>6</sub>) δ 169.71, 168.10, 163.38, 151.47, 149.44, 137.86, 137.35, 129.97, 127.05, 125.03, 123.67, 121.59, 112.04, 44.10. HRMS (ESI): *m/z* calcd for C<sub>15</sub>H<sub>12</sub>N<sub>4</sub>O<sub>2</sub>SCl [M+H]<sup>+</sup> 347.0370; found: 347.0368.



Data 32.  $^{13}\text{C}$ -NMR Spektral Data of M11

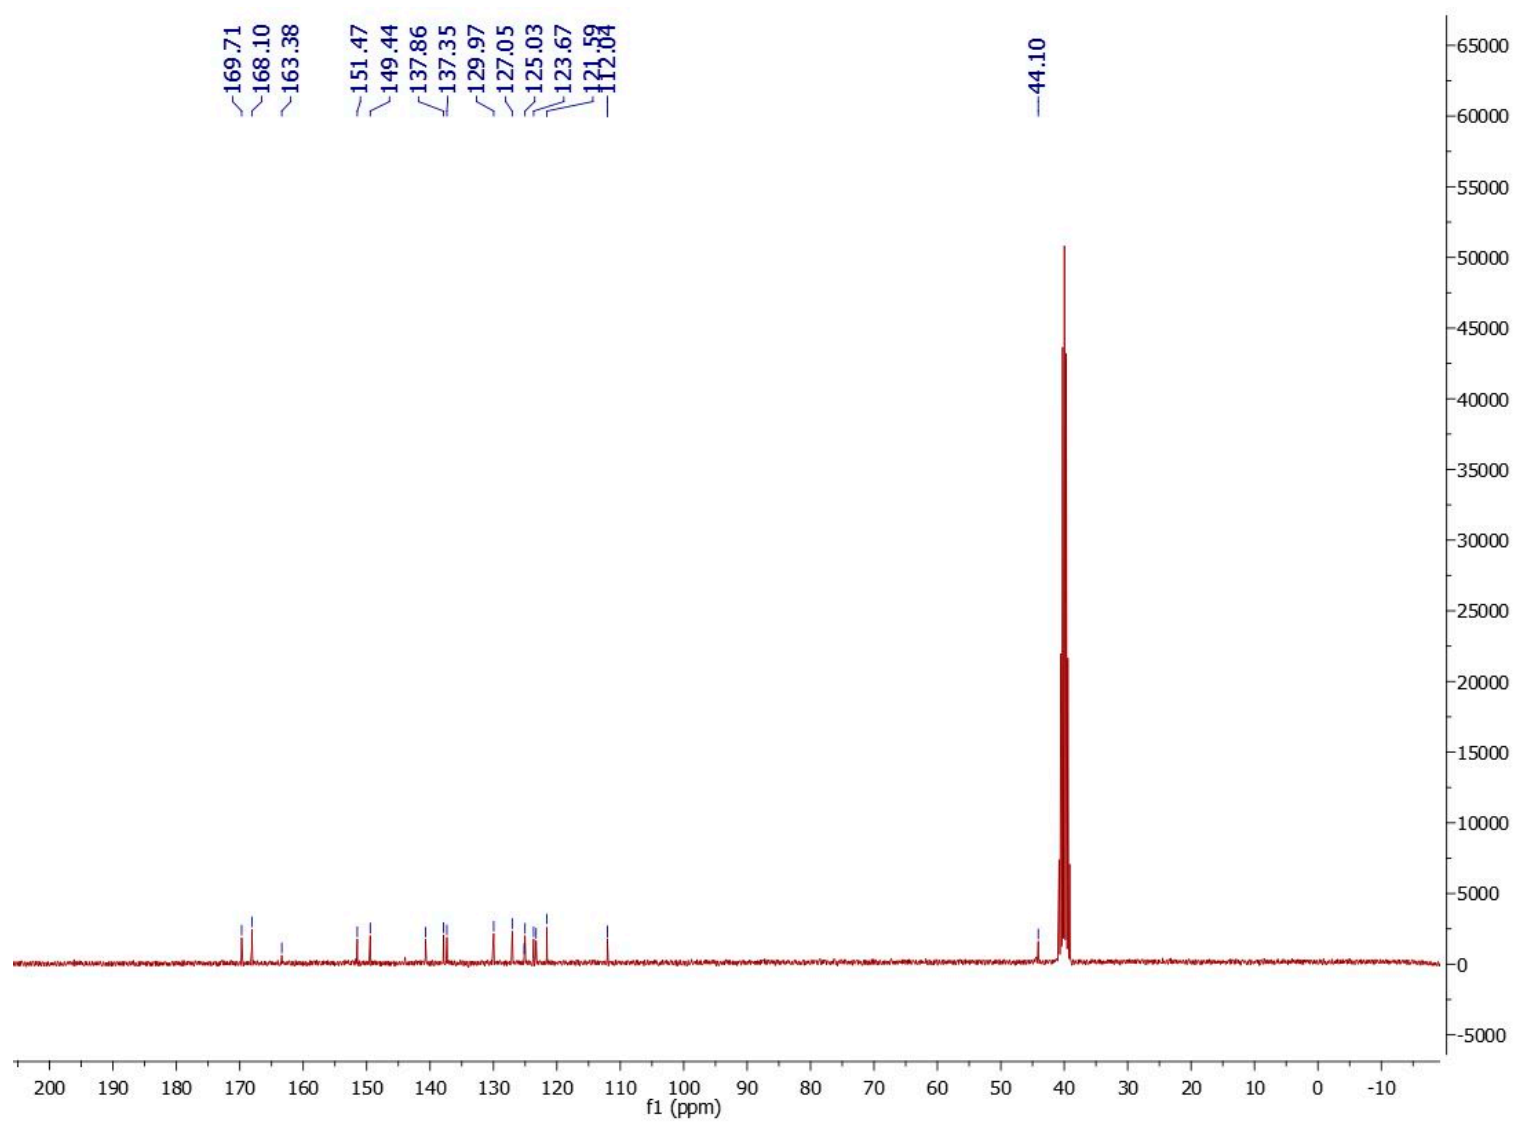

# Data 33. Mass Spectrum Data of M11

## Single Mass Analysis

Tolerance = 5.0 PPM / DBE: min = -1.5, max = 50.0

Element prediction: Off

Number of isotope peaks used for i-FIT = 3

Monoisotopic Mass, Even Electron Ions

109 formula(e) evaluated with 1 results within limits (up to 50 closest results for each mass)

Elements Used:

| Mass     | Calc. Mass | mDa  | PPM  | DBE  | Formula            | i-FIT | i-FIT (Norm) | C  | H  | N | O | S | Cl |
|----------|------------|------|------|------|--------------------|-------|--------------|----|----|---|---|---|----|
| 347.0368 | 347.0370   | -0.2 | -0.6 | 11.5 | C15 H12 N4 O2 S Cl | 292.9 | 0.0          | 15 | 12 | 4 | 2 | 1 | 1  |

T610K-12022021 228 (3.260) Cm (225:228)

1: TOF MS ES+

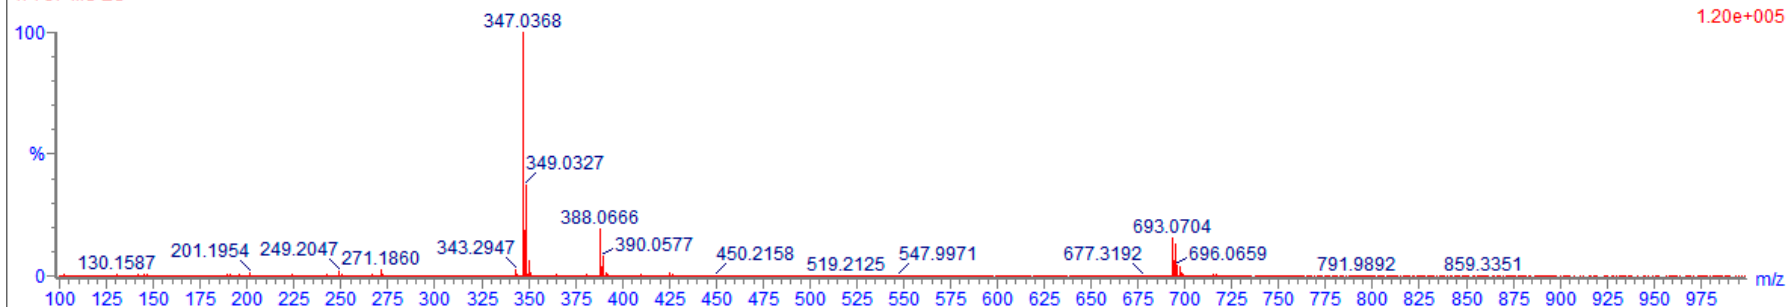

T610K-12022021

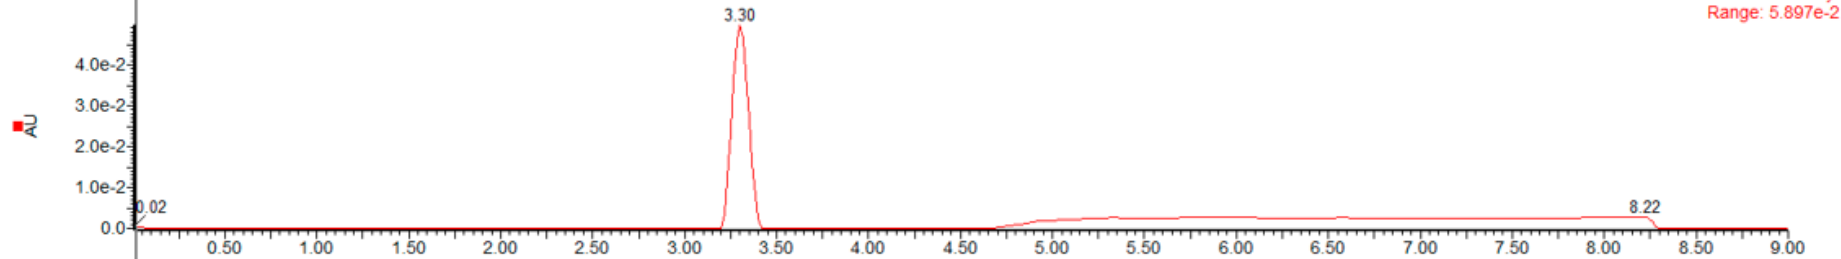

**Data 34.  $^1\text{H}$ -NMR Spektral Data of M12**

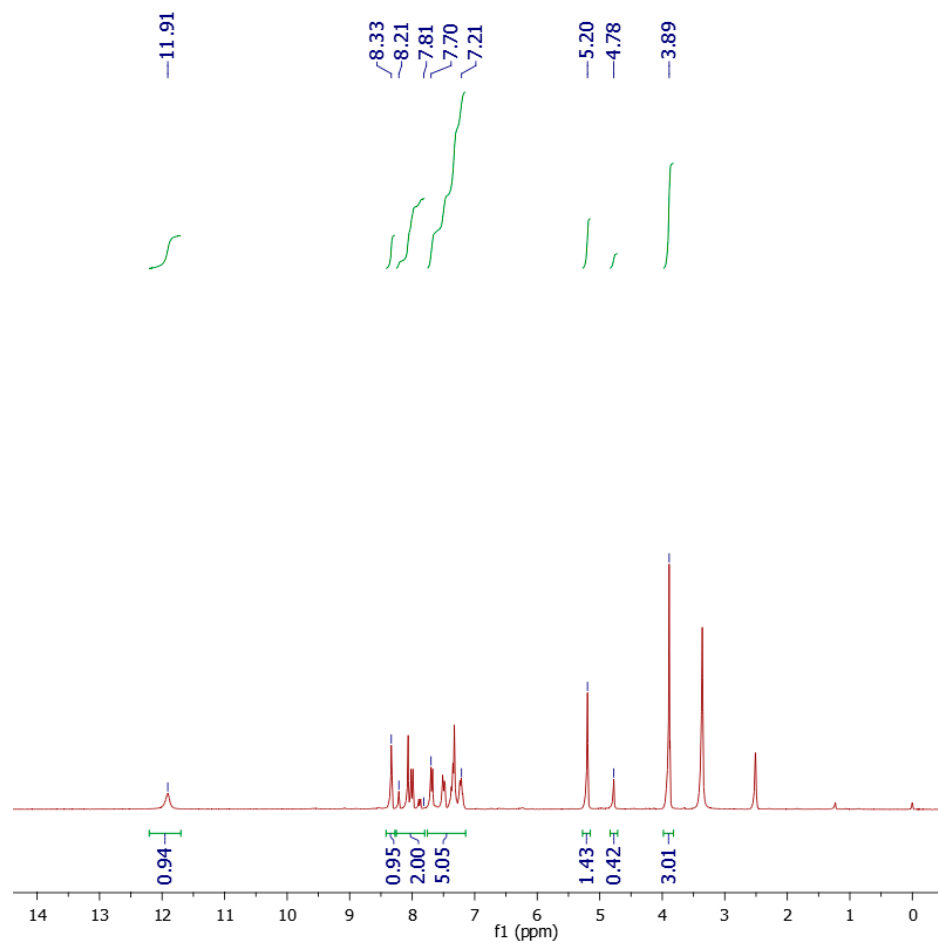

(E/Z;78/22)-N'-((6-methoxypyridin-3-yl)methylene)-2-(2-oxobenzo[d]thiazol-3(2H)-yl) acetohydrazide (**M12**)

Yield: 55%; mp: 226-7 °C, white powder.  $^1\text{H}$  NMR (400 MHz, DMSO- $d_6$ ):  $\delta$  3.89 (s, 3H,  $\text{CH}_3$ ) 4.78 (s, 2H,  $-\text{CH}_2$ , %22), 5.20 (s, 2H,  $-\text{CH}_2$ , %78), 7.21-7.70 (m, 5H), 7.81-8.21 (m, 2H), 8.33 (m, H,  $\text{N}=\text{CH}$ ), 11.91 (s, H, NH).  $^{13}\text{C}$  NMR (100 MHz, DMSO- $d_6$ )  $\delta$  169.71, 167.80, 156.52, 151.93, 145.75, 145.07, 137.90, 137.39, 123.64, 123.26, 121.86, 121.58, 112.08, 56.28, 44.01. HRMS (ESI):  $m/z$  calcd for  $\text{C}_{16}\text{H}_{15}\text{N}_4\text{O}_3\text{S}$   $[\text{M}+\text{H}]^+$  343.0865; found: 343.0868.

Data 35.  $^{13}\text{C}$ -NMR Spektral Data of M12

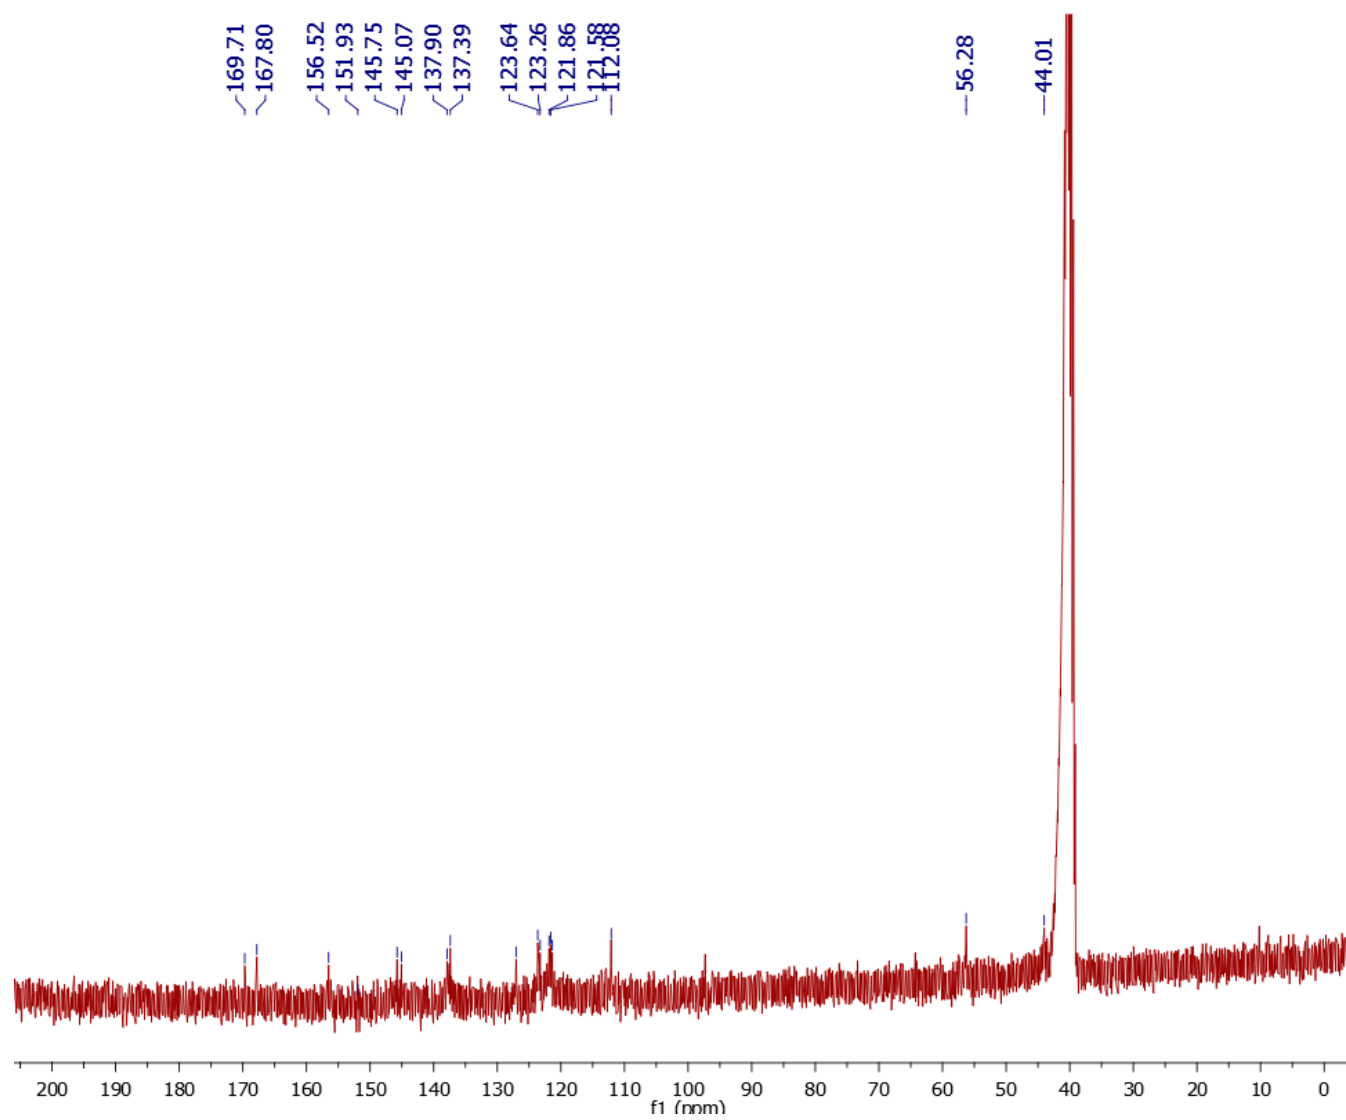

### Data 36. Mass Spectrum Data of M12

#### Single Mass Analysis

Tolerance = 5.0 PPM / DBE: min = -1.5, max = 50.0

Element prediction: Off

Number of isotope peaks used for i-FIT = 3

Monoisotopic Mass, Even Electron Ions

66 formula(e) evaluated with 1 results within limits (up to 50 closest results for each mass)

Elements Used:

| Mass     | Calc. Mass | mDa | PPM | DBE  | Formula         | i-FIT | i-FIT (Norm) | C  | H  | N | O | S |
|----------|------------|-----|-----|------|-----------------|-------|--------------|----|----|---|---|---|
| 343.0868 | 343.0865   | 0.3 | 0.9 | 11.5 | C16 H15 N4 O3 S | 463.9 | 0.0          | 16 | 15 | 4 | 3 | 1 |

T611-25022021 170 (2.437) Cm (170:172)

1: TOF MS ES+

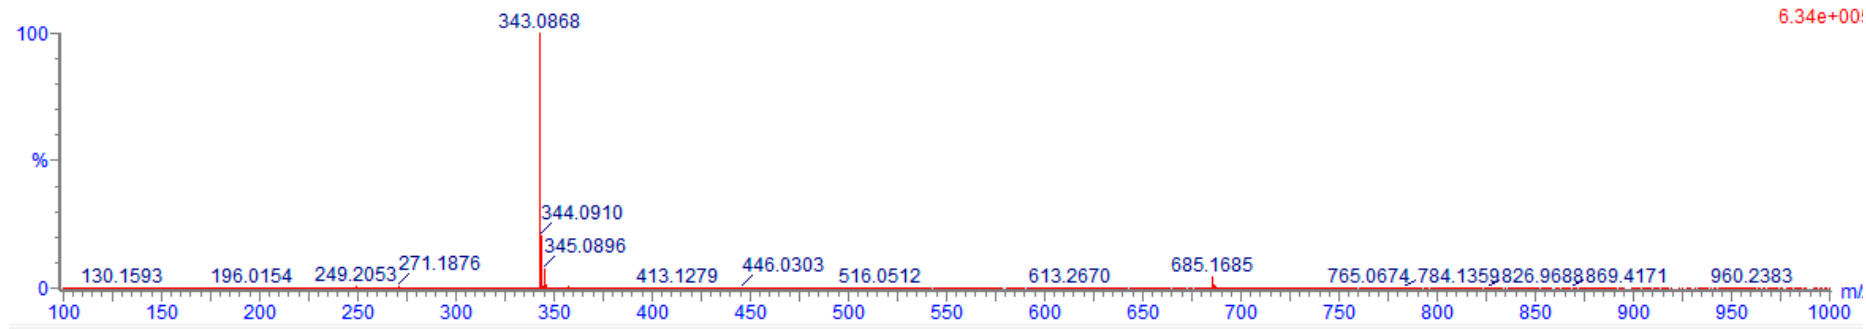

T611-25022021

3: Diode Array  
Range: 1.504

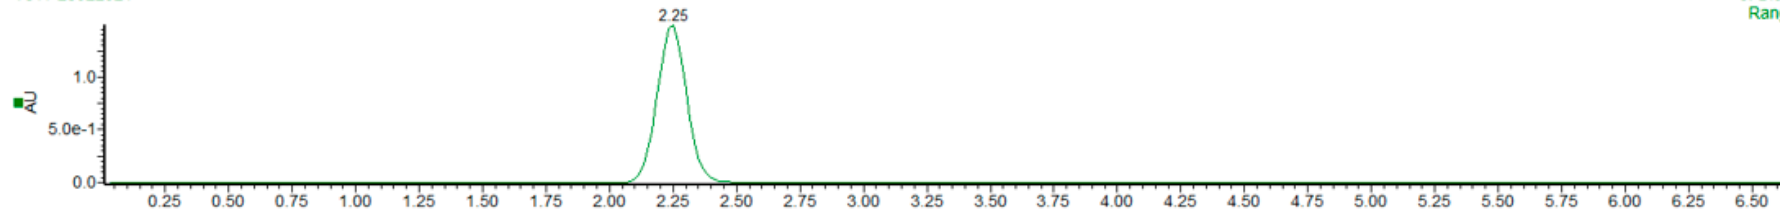

**Data 37. <sup>1</sup>H-NMR Spektral Data of M13**

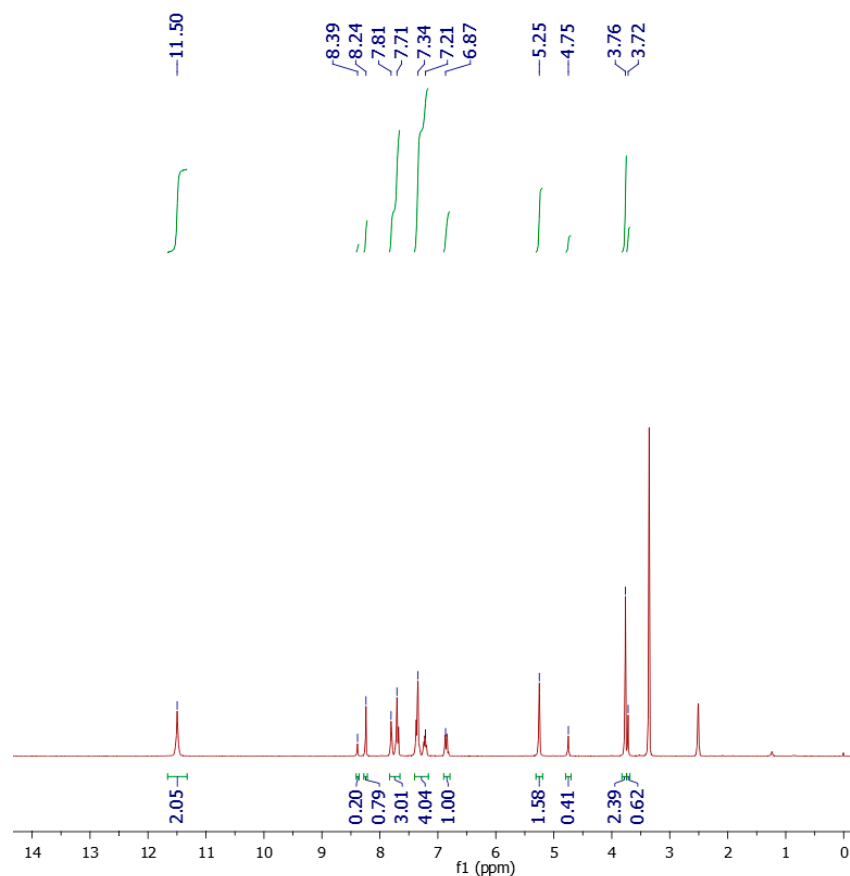

(E/Z;79/21)-N'-((6-methoxy-1H-indol-3-yl)methylene)-2-(2-oxobenzo[d]thiazol-3(2H)-yl)acetohydrazide (**M13**)

Yield: 62%; mp: 262-3 °C, white powder. <sup>1</sup>H NMR (400 MHz, DMSO-d): δ 3.72 (s, 3H, CH<sub>3</sub>, 21%), 3.76 (s, 3H, CH<sub>3</sub>, 79%), 4.75 (s, 2H, -CH<sub>2</sub>, %22), 5.25 (s, 2H, -CH<sub>2</sub>, %78), 6.87 (m, H), 7.21-7.34 (m, 4H), 7.71-7.81 (m, 3H), 8.24 (s, H, N=CH, 79%), 8.39 (s, H, N=CH, 21%), 11.50 (s, 2H, NH). <sup>13</sup>C NMR (100 MHz, DMSO-d) δ 169.77, 166.71, 154.92, 142.37, 138.10, 132.42, 131.55, 127.01, 125.07, 123.58, 123.19, 121.56, 113.08, 112.87, 112.28, 111.42, 103.97, 55.55, 43.72. HRMS (ESI): *m/z* calcd for C<sub>19</sub>H<sub>17</sub>N<sub>4</sub>O<sub>3</sub>S [M+H]<sup>+</sup> 381.1021; found: 381.101

Data 38.  $^{13}\text{C}$ -NMR Spektral Data of M13

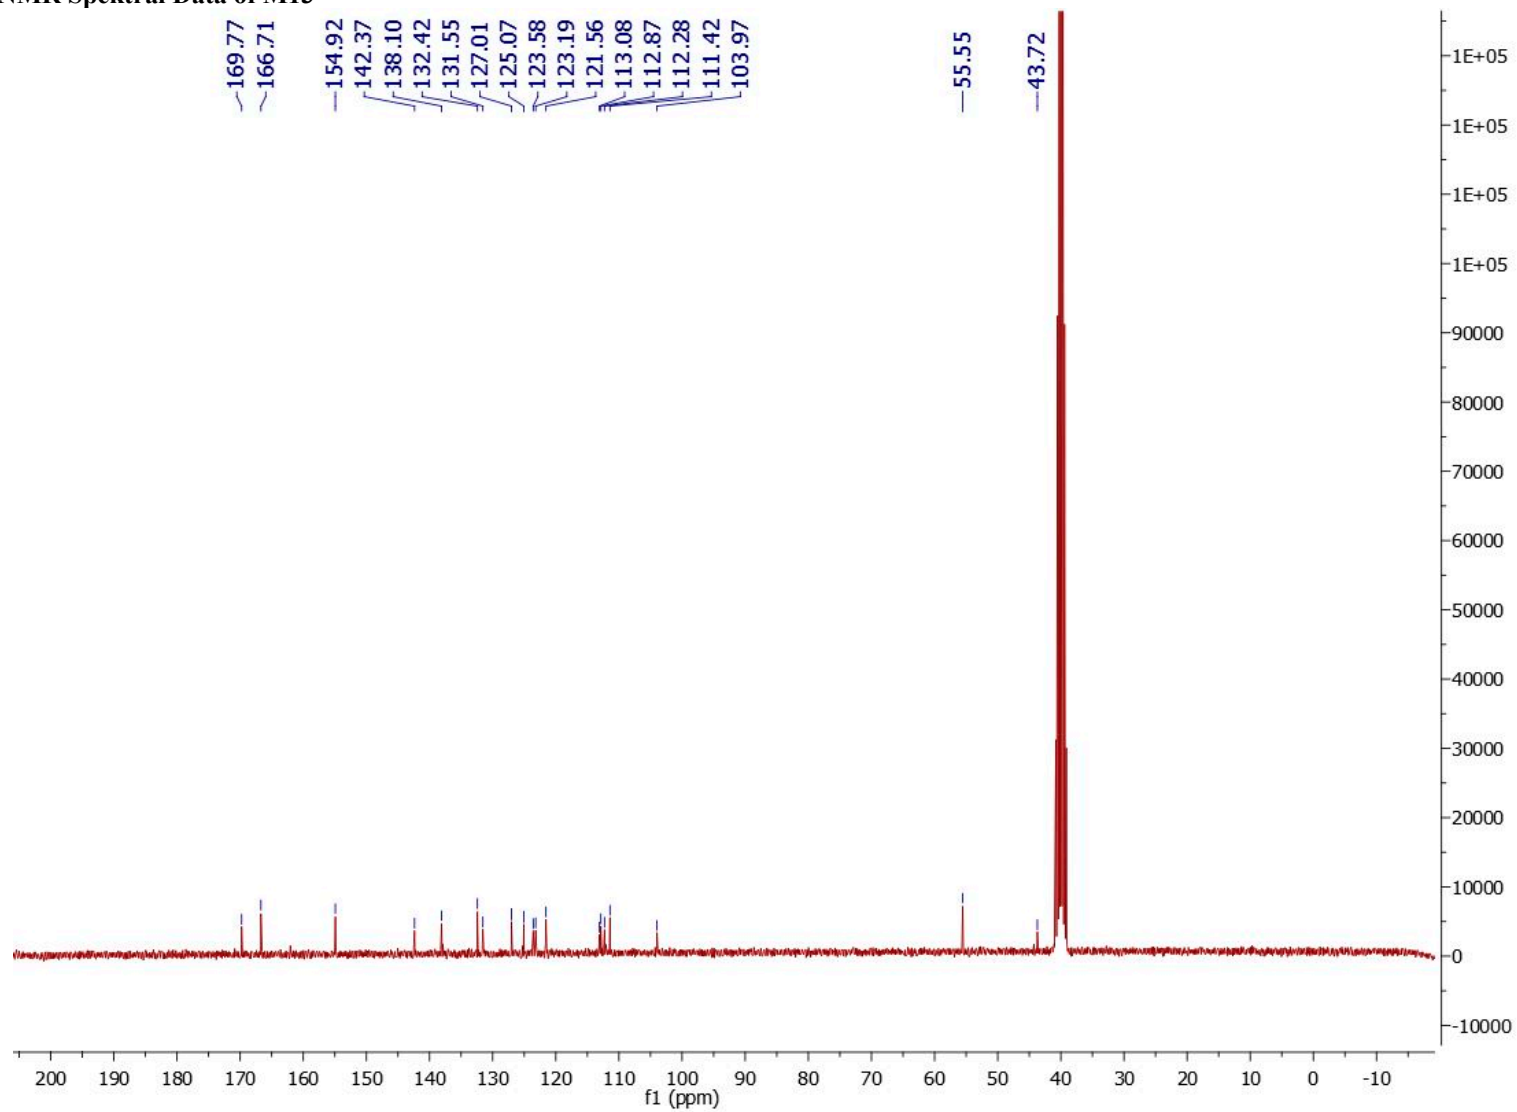

### Data 39. Mass Spectrum Data of M13

#### Single Mass Analysis

Tolerance = 5.0 PPM / DBE: min = -1.5, max = 50.0

Element prediction: Off

Number of isotope peaks used for i-FIT = 3

Monoisotopic Mass, Even Electron Ions

34 formula(e) evaluated with 1 results within limits (up to 50 closest results for each mass)

Elements Used:

| Mass     | Calc. Mass | mDa  | PPM  | DBE  | Formula                                                         | i-FIT | i-FIT (Norm) | C  | H  | N | O | S |
|----------|------------|------|------|------|-----------------------------------------------------------------|-------|--------------|----|----|---|---|---|
| 381.1017 | 381.1021   | -0.4 | -1.0 | 13.5 | C <sub>19</sub> H <sub>17</sub> N <sub>4</sub> O <sub>3</sub> S | 451.3 | 0.0          | 19 | 17 | 4 | 3 | 1 |

T612KRS-18022021 172 (2.456) Cm (172:175)

1: TOF MS ES+

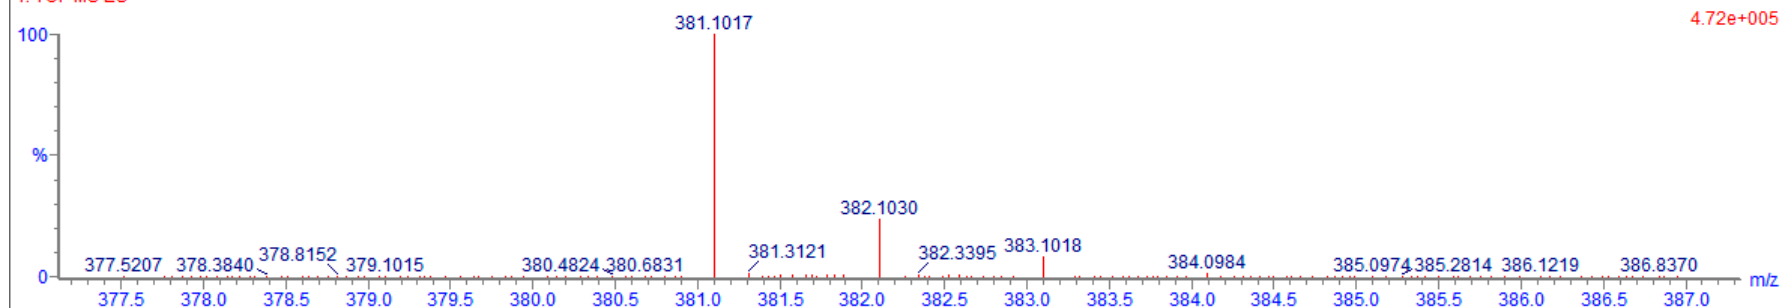

T612-25022021

3: Diode Array  
Range: 1.125

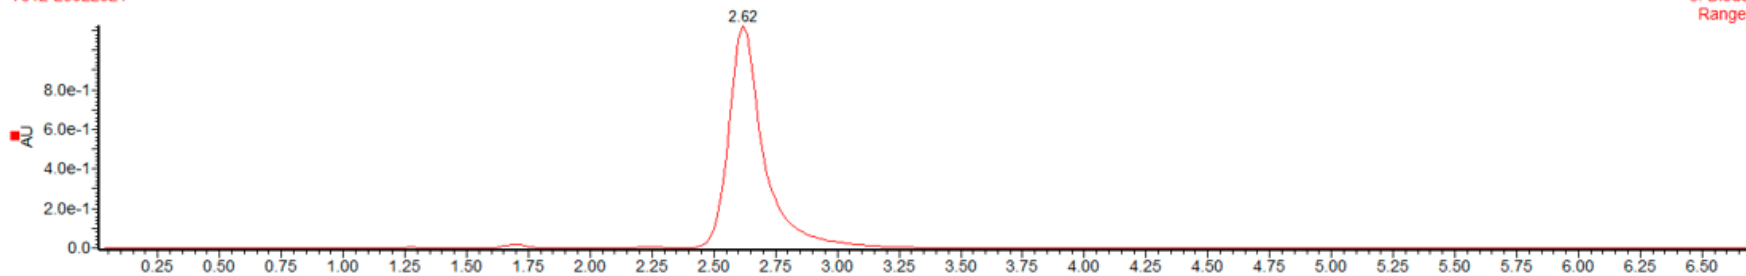



**Table S1.** Inhibitions of MAO by **M** series<sup>a</sup>

| Compound                | Residual activity at 10 $\mu$ M (%) |                                                |
|-------------------------|-------------------------------------|------------------------------------------------|
|                         | MAO-A                               | MAO-B                                          |
| <b>M1</b>               | 97.50 $\pm$ 0.36                    | 83.52 $\pm$ 0.12                               |
| <b>M2</b>               | 88.40 $\pm$ 1.81                    | 80.88 $\pm$ 0.01                               |
| <b>M3</b>               | 88.31 $\pm$ 2.73                    | 73.37 $\pm$ 2.53                               |
| <b>M4</b>               | 95.33 $\pm$ 5.03                    | 83.25 $\pm$ 0.27                               |
| <b>M5</b>               | 85.14 $\pm$ 2.06                    | 77.43 $\pm$ 4.11                               |
| <b>M6</b>               | 94.20 $\pm$ 3.64                    | 83.25 $\pm$ 0.27                               |
| <b>M7</b>               | 81.34 $\pm$ 2.71                    | 78.89 $\pm$ 5.26                               |
| <b>M8</b>               | 102.40 $\pm$ 1.68                   | 82.42 $\pm$ 3.79                               |
| <b>M9</b>               | 84.39 $\pm$ 2.15                    | 76.99 $\pm$ 4.43                               |
| <b>M10</b>              | 93.58 $\pm$ 4.30                    | <b>39.17 <math>\pm</math> 0.06<sup>b</sup></b> |
| <b>M11</b>              | 92.97 $\pm$ 2.72                    | 89.46 $\pm$ 1.73                               |
| <b>M12</b>              | 86.65 $\pm$ 2.30                    | 85.90 $\pm$ 5.01                               |
| <b>M13</b>              | 98.02 $\pm$ 4.51                    | 76.74 $\pm$ 4.42                               |
| Toloxatone <sup>c</sup> | 1.080 $\pm$ 0.025                   | -                                              |
| Lazabemide <sup>c</sup> | -                                   | 0.110 $\pm$ 0.016                              |
| Clorgyline <sup>c</sup> | 0.007 $\pm$ 0.001                   | -                                              |
| Pargyline <sup>c</sup>  | -                                   | 0.140 $\pm$ 0.006                              |

<sup>a</sup> Results are the means  $\pm$  standard errors of duplicate or triplicate experiments.<sup>b</sup> IC<sub>50</sub> value of MAO-B was 2.75  $\pm$  0.44  $\mu$ M.<sup>c</sup> IC<sub>50</sub> value of MAO-A and MAO-B, respectively
